# Supplementary material for: Fostering humanism: a mixed methods evaluation of the Footprints Project in critical care
Source: PubMed Central journal article supplement — BMJ Open. 2019 Nov 2;9(11):e029810. doi: 10.1136/bmjopen-2019-029810 (PMC6830601; doi:10.1136/bmjopen-2019-029810), 2019-11-02
Supplement: bmjopen-2019-029810.draft_revisions.pdf [file bmjopen-2019-029810.draft_revisions.pdf]

# BMJ Open

BMJ Open is committed to open peer review. As part of this commitment we make the peer review history of every article we publish publicly available.

When an article is published we post the peer reviewers' comments and the authors' responses online. We also post the versions of the paper that were used during peer review. These are the versions that the peer review comments apply to.

The versions of the paper that follow are the versions that were submitted during the peer review process. They are not the versions of record or the final published versions. They should not be cited or distributed as the published version of this manuscript.

BMJ Open is an open access journal and the full, final, typeset and author-corrected version of record of the manuscript is available on our site with no access controls, subscription charges or pay-per-view fees (<http://bmjopen.bmj.com>).

If you have any questions on BMJ Open's open peer review process please email [info.bmjopen@bmj.com](mailto:info.bmjopen@bmj.com)

# BMJ Open

## Fostering Humanism in Critical Care: The Footprints Project

|                               |                                                                                                                                                                                                                                                                                                                                                                                                                                                                                                                                                                                                                                                                                                        |
|-------------------------------|--------------------------------------------------------------------------------------------------------------------------------------------------------------------------------------------------------------------------------------------------------------------------------------------------------------------------------------------------------------------------------------------------------------------------------------------------------------------------------------------------------------------------------------------------------------------------------------------------------------------------------------------------------------------------------------------------------|
| Journal:                      | <i>BMJ Open</i>                                                                                                                                                                                                                                                                                                                                                                                                                                                                                                                                                                                                                                                                                        |
| Manuscript ID                 | bmjopen-2019-029810                                                                                                                                                                                                                                                                                                                                                                                                                                                                                                                                                                                                                                                                                    |
| Article Type:                 | Research                                                                                                                                                                                                                                                                                                                                                                                                                                                                                                                                                                                                                                                                                               |
| Date Submitted by the Author: | 28-Feb-2019                                                                                                                                                                                                                                                                                                                                                                                                                                                                                                                                                                                                                                                                                            |
| Complete List of Authors:     | Hoad, Neala; St Josephs Healthcare Hamilton, Critical Care Swinton, Marilyn; McMaster University, Takaoka, Alyson; McMaster University, Department of Health Research Methods, Evaluation and Impact<br>Tam, Benjamin; Niagara Health System, Critical Care<br>Shears, Melissa; McMaster University, Clinical Epidemiology<br>Waugh, Lily; St Josephs Healthcare Hamilton, Critical Care<br>Toledo, Feli; St Josephs Healthcare Hamilton, Critical Care<br>Clarke, France; McMaster University, Clinical Epidemiology and Biostatistics<br>Duan, Erick; McMaster University; Niagara Health System<br>Soth, Mark; St Josephs Healthcare Hamilton, Critical Care<br>Cook, Deborah; McMaster University, |
| Keywords:                     | Adult intensive & critical care < ANAESTHETICS, Humanism, mixed methods                                                                                                                                                                                                                                                                                                                                                                                                                                                                                                                                                                                                                                |
|                               |                                                                                                                                                                                                                                                                                                                                                                                                                                                                                                                                                                                                                                                                                                        |

SCHOLARONE™  
Manuscripts

**Fostering Humanism in Critical Care:  
The Footprints Project**

N Hoad, RN- Corresponding Author  
Intensive Care Unit, St Joseph's Healthcare, Hamilton, Canada  
[nealahoad@gmail.com](mailto:nealahoad@gmail.com)

M Swinton, MSc  
Department of Health Research Methods, Evidence and Impact, McMaster University, Hamilton, Canada  
[swinton@mcmaster.ca](mailto:swinton@mcmaster.ca)

A Takaoka, BSc  
Department of Health Research Methods, Evidence and Impact, McMaster University, Hamilton, Canada  
[takaokam@mcmaster.ca](mailto:takaokam@mcmaster.ca)

B Tam, MD, MSc  
Intensive Care Unit, St. Catharines Site, Niagara Health, Department of Medicine, McMaster University,  
Hamilton, Canada  
[benjaminhltam@gmail.com](mailto:benjaminhltam@gmail.com)

M Shears, BSc  
Queen University, Department of Medicine, Kingston Canada  
[melsshears@gmail.com](mailto:melsshears@gmail.com)

L Waugh, RN  
Intensive Care Unit, St Joseph's Healthcare, Hamilton, Canada  
[lwaugh@stjosham.on.ca](mailto:lwaugh@stjosham.on.ca)

F Toledo, M Div  
Spiritual Care Department, St Joseph's Healthcare, Hamilton, Canada  
[ftoledo@stjosham.on.ca](mailto:ftoledo@stjosham.on.ca)

F Clarke, RRT  
Department of Health Research Methods, Evidence and Impact, McMaster University, Hamilton, Canada  
[clarkef@mcmaster.ca](mailto:clarkef@mcmaster.ca)

E Duan, MD  
Intensive Care Unit, St Joseph's Healthcare, Department of Medicine, McMaster University, Hamilton, Canada  
[erick.duan@medportal.ca](mailto:erick.duan@medportal.ca)

M Soth, MD  
Intensive Care Unit, St Joseph's Healthcare, Department of Medicine, McMaster University, Hamilton, Canada  
[msoth@stjosham.on.ca](mailto:msoth@stjosham.on.ca)

DJ Cook, MD, MSc  
Intensive Care Unit, St Joseph's Healthcare, Departments of Medicine, Health Research Methods, Evidence and  
Impact, McMaster University, Hamilton, Canada  
[debcook@mcmaster.ca](mailto:debcook@mcmaster.ca)

## Abstract

**Background:** The technologic focus of the intensive care unit (ICU) can overshadow the 'lives lived' of critically ill patients. We developed a personalized patient Footprints Form and Whiteboard to facilitate holistic, patient-centered care, to inform clinical encounters, and to create deeper connections among patients, families, and clinicians.

**Objectives:** The objectives of this mixed-methods study were to assess the uptake, sustainability, and influence of the Footprints Project.

**Methods:** In a 22-bed university-affiliated ICU, we used 10 implementation strategies to enhance use of the Footprints Form and Whiteboard. We conducted 3 audits to examine uptake and sustainability. We conducted semi-structured interviews with 10 clinicians, and held 5 focus groups with 25 clinicians; and we interviewed 5 patients and 13 family representatives of 5 patients who survived and 5 who died in the ICU. Transcripts were analyzed using qualitative content analysis.

**Results:** The Footprints Project facilitated holistic, patient-centered care by setting the stage for patient and family experience, motivating the patient, and humanizing the patient for clinicians. Through informing clinical encounters, Footprints helped clinicians initiate more personal conversations, foster deeper connections and guide treatment. Professional practice influences included more focused attention on the patient, enhanced interdisciplinary communication and changes in community culture. Initially used in 15.8% of patients (audit A), uptake increased to 51.4% in Audit B, and was sustained at 57.8% in Audit C.

**Conclusions:** By sharing valuable personal information about patients before and beyond their illness on individualized whiteboards at each bedside, the Footprints Project fosters humanism in critical care practice.

N=250 words in abstract

N= 3791 words in text

Limitations of this Study

- 1
- 2
- 3
- 4 1. Clinician impressions about how Footprints has influenced the culture of the unit does not imply
- 5 causality, nor does vernacular use of the term 'culture' indicate a validated sociologic construct.
- 6
- 7 2. We had a modest number of patient and family interviews.
- 8
- 9 3. Whether these results are generalizable to other wards or jurisdictions merits further evaluation.
- 10
- 11
- 12

### 13 Strengths of this Study

14

15

16

- 17 1. This was a mixed-methods design informed by interdisciplinary engagement.
- 18
- 19 2. We elicited views of patients, family members, and clinicians about the Footprints Project.
- 20
- 21 3. We used a multi-modal enabling and reminding approach to enhance and sustain uptake.
- 22
- 23
- 24
- 25
- 26
- 27
- 28
- 29
- 30
- 31
- 32
- 33
- 34
- 35
- 36
- 37
- 38
- 39
- 40
- 41
- 42
- 43
- 44
- 45
- 46
- 47
- 48
- 49
- 50
- 51
- 52
- 53
- 54
- 55
- 56
- 57
- 58
- 59
- 60

1  
2 “And from there, our conversation begins.....” [Chaplain]  
3  
4  
5

## 6 **Introduction**

7  
8  
9

10 Barriers to patient self-expression can engender a loss of identity, creating distance between patients and  
11 clinicians (1). Difficulty that clinicians may have acknowledging their shared humanity with patients may  
12 contribute to clinician detachment (2). Such disengagement may serve as self-protection while working in an  
13 emotional environment, (3) but may attenuate empathy (3). In the intensive care unit (ICU), life-sustaining  
14 technologies and attendant communication challenges can also dehumanize patients.  
15  
16  
17  
18  
19  
20

21 Information that patients and families want shared with the healthcare team may be revealed by questionnaires,  
22 refocusing attention on personhood. For hospital-based palliative care, Chochinov and colleagues developed the  
23 Patient Dignity Question (PDQ) (2) - a single open-ended question, “What do I need to know about you as a  
24 person to give you the best care possible?” The resulting patient-partnered paragraph is placed on the chart.  
25 Clinicians reported learning something new about patients, influencing care; families recommended using the  
26 PDQ. These investigators developed a 10-item instrument documenting personal attributes called 'This is ME'  
27 (TIME) (4). Most residents canvassed in 6 nursing homes recommended using TIME, and wanted the summary  
28 placed in their chart. Clinicians stated that TIME enhanced their respect and compassion for patients.  
29  
30  
31  
32  
33  
34  
35  
36  
37

38 Communication boards can also express patients' personhood. Gerontology nurses introduced the 'All About Me'  
39 board for persons with dementia unable to speak for themselves (5), offering families the opportunity to express  
40 their loved one's personality and preferences on a board installed in the patient's room. An ICU study found that  
41 conscious patients who offer information to place on their communication board may be more satisfied with care  
42 (6).  
43  
44  
45  
46  
47  
48  
49

50 We developed the Footprints Project to promote the personhood of critically ill patients, hypothesizing this could  
51 be actualized by a combined written tool (Footprints Form) and communication board (Footprints Whiteboard).  
52

53 The overall goals of the Footprints Project were to facilitate holistic, patient-centered care, inform clinical  
54  
55  
56  
57  
58  
59  
60

1 encounters, and create deeper connections among patients, families, and clinicians. Building on extensive pilot  
2 work (7-9), we incorporated Footprints into daily practice in the ICU at St. Joseph's Healthcare Hamilton.  
3  
4

5  
6  
7 The objectives of this study were to assess the 1) uptake, 2) sustainability and 3) influence of the Footprints  
8 Project using both qualitative and quantitative methods.  
9  
10

## 11 12 13 **Methods**

14  
15  
16  
17 The Footprints Form documents personal information about a patient's story in a structured 16-item  
18 questionnaire completed by family members or friends (or patients, if able) [supplementary file 1]. The second  
19 component transcribes key information from the form onto a dedicated Footprints Whiteboard in each patient's  
20 room. The completed Footprints Form is placed in the medical chart.  
21  
22  
23

24  
25  
26  
27 The Footprints Project was a nursing-led inter-professional initiative in a 22-bed university-affiliated, medical-  
28 surgical ICU at St. Joseph's Healthcare Hamilton, developed following stakeholder engagement, 6-phase pilot  
29 testing [Table 1], and baseline measurements (January 2015 - December 2016). Based on challenges  
30 discovered during pilot testing, we introduced 10 implementation strategies (January to July 2017) [Table 2].  
31  
32  
33

34  
35  
36 In this mixed-methods study [supplementary file 2], we addressed objectives 1-2 through audits, and objectives  
37 1-3 through interviews and focus groups.  
38  
39  
40

## 41 42 **Quantitative Data**

43  
44  
45  
46 Following baseline measurements (Audit A) during pilot work, we conducted two 1-month audits. Audit B (July  
47 2017) evaluated uptake (objective 1); Audit C (April 2018) evaluated sustainability (objective 2). Each audit  
48 documented patient data (e.g., mechanical ventilation, length of stay) and Footprints data (e.g., completed  
49 questions on the Form and transposition of pertinent information onto the Whiteboard). We defined a completed  
50 form as having  $\geq 1$  question completed. Audit A was a 1-day, concealed, observation period; Audits B and C  
51 were 5-days, informing bedside staff to concurrently elicit feedback.  
52  
53  
54  
55  
56  
57  
58  
59  
60

## Qualitative Data

To understand the influence of the Footprints Project on ICU clinicians, we conducted 10 semi-structured interviews (10 clinicians) and 5 focus groups (25 clinicians), between Audits B and C. Clinicians included 3 bedsides nurses, 1 charge-nurse, 4 physiotherapists, 2 respiratory therapists, 2 chaplains, 1 clerk and 12 physicians (5 fellows, 4 residents, 3 intensivists). We used purposive sampling to identify clinicians working in the ICU for  $\geq 1$  year (except trainees), inviting participation by email. All invited clinicians participated.

To explore the influence of the Footprints Project on the experience of patients, we interviewed 5 survivors on the ward. We interviewed 13 family members of 10 different patients to understand the influence of the Footprints Project (5 families of survivors and 5 families of decedents). Selection criteria were English-speaking and patients in ICU for  $\geq 1$  week with completed whiteboards. Participation was by telephone or in-person. All invited patients and families participated.

A lead researcher with qualitative methods training who does not work in the ICU (MS) and had no prior relationship with participants conducted interviews and focus groups in a hospital office or conference room; one family member was interviewed by telephone. A nurse (NH) and physician (DC) with qualitative methods training interviewed 5 patients they previously cared for. Semi-structured interview and focus group guides were used; each interviewer kept field notes from the focus groups and interviews. Interviews and focus groups were digitally recorded, transcribed and anonymized.

## Public and Patient Involvement

The motivation for this project was humanizing members of the public when they are technologically dependent in the ICU; in this sense, the public motivated the aims of our research. We sought direct input from patients and families about the Footprints Form and Whiteboard through interviews. In this sense, patients and family members advised about the content and format of the Footprints Form and Whiteboard. We solicited their views about whether and how the Footprints Project influenced their experience of being in the ICU. Their voices motivated us to continue with the Footprints Project.

## Role of the Sponsor



1  
2 The sponsors had no role in the design, conduct, interpretation or write-up of this study.  
3  
4

### 5 6 **Data Sharing**

7 De-identified data will be available upon request and research ethics board approval.  
8  
9

### 10 11 **Transparency Declaration**

12  
13 The information and findings contained in this manuscript represent an honest, accurate and transparent  
14 account of the study. No aspects have been omitted and any discrepancies have been explained.  
15  
16

### 17 18 19 **Dissemination Declaration**

20  
21 Study results will be shared with clinician participants at local interprofessional rounds and meetings. We will  
22 share the Footprints materials and methods with interested parties in other wards and hospitals, at conferences  
23 and peer-review literature.  
24  
25  
26

### 27 28 29 **Analysis**

30  
31  
32 We analyzed the uptake between Audits A and B, comparing the proportion of completed Footprints activities  
33 (e.g., completion of the form, information transposed onto the whiteboard, form on patients' chart). Whiteboard  
34 information contained dynamic (e.g., date, staff names, patient milestones), and static (patient name, family  
35 members) data. We assessed sustainability by comparing Audits B and C, summarizing quantitative data using  
36 descriptive statistics.  
37  
38  
39  
40  
41  
42

43  
44 Conventional content analysis was used, whereby codes are derived directly from the data without preconceived  
45 categories or theoretical perspectives (10), yielding a descriptive summary of findings, consistent with qualitative  
46 description (11). Three investigators completed line-by-line open coding of 1 focus group and 5 interview  
47 transcripts, discussed resulting codes, and developed the preliminary coding list. Remaining transcripts were  
48 coded by one investigator using an audit trail documenting changes (12); the coding structure evolved during  
49 team consensus meetings. N'Vivo (V 11.0) was used for data management. We held an off-site member-  
50 checking event with 10 interprofessional colleagues.  
51  
52  
53  
54  
55  
56  
57  
58  
59  
60

## Ethics

The Hamilton Integrated Research Ethics Board approved this study. Written informed consent was obtained from all participants.

## Results

### Quantitative Results: *Uptake & Sustainability*

Reflecting the pilot phase, Audit A showed use of the Footprints Form and Whiteboard for 9/57 patients (15.8%). Following 10 implementation strategies, form completion increased significantly (Audit B, 36/70) patients (51.4%) (independent t-test mean difference (MD) 0.37 [95% CI 0.21, 0.53],  $p < 0.001$ ) [Table 3]. Form completion was sustained between Audit B (51.4%) and C (57.8%) (MD 0.078 [95% CI -0.93, 0.249],  $p = 0.368$ ).

Using patient-days to assess dynamic whiteboard information in Audits B (n=242) and C (n=247), there were no significant differences in completion. For patients in Audits B (n=70) and C (n=64), most static whiteboard data completion rates were unchanged; however, whiteboard posting of patients' preferred name significantly increased (MD 0.19 [95% CI 0.07, 0.40],  $p = 0.006$ ), while messages on the board declined (MD -0.19 [95% CI -0.35, -0.04],  $p = 0.01$ ) [Table 4].

### Qualitative Results: *Uptake & Sustainability*

Initially, clinician views on Footprints utilization reflected inconsistent uptake:

I think it's also to do with modeling ... So, for example, nobody is even bothering to look at this whiteboard, the nurses are not bringing it up. You, as a team, are completely disconnected from it whether it's filled out well or not....If [physician name] is on, of course, or, if [RN names] are at the bedside...the reminders are going to be there. [fellow]

1  
2 Clinicians identified implementation challenges which we grouped into patient, clinician and system-level barriers  
3  
4 [Table 5]. Clinicians expressed how gradually, the Footprints Project became integrated into practice.  
5  
6

7  
8 One physiotherapist shared: "I totally believe it's sustainable. It's become core. It's certainly become an  
9 important part of how I function from day to day in the ICU." [physiotherapist]  
10  
11

12  
13 A physician described:  
14  
15

16  
17 "It's common place now, for there to be not just something on the board but something in the room that's important  
18 to, or comforts, that person, whereas I think that used to be more the exception and not the standard. I think what  
19 [Footprints] does is it makes establishing that understanding of the patient as an expectation... So instead of when  
20 it's been there, seeing it as a bonus, when it's not there, it's seen as the exception." [physician]  
21  
22  
23  
24  
25

### 26 27 **Qualitative Results: *Influence***

28  
29  
30 Patients and family members described how Footprints influenced their experience. Clinicians reported diverse  
31 purposes of the Footprints Project, with beneficial consequences.  
32  
33  
34  
35

### 36 37 **Facilitating holistic, patient-centered care**

38  
39  
40 The Footprints Project **sets the stage for the patient and family, motivates the patient, and humanizes the**  
41 **patient for clinicians.**  
42  
43  
44  
45

### 46 47 **Setting the stage**

48  
49 A patient shared how it felt to have the team know personal information about him:  
50  
51  
52

53  
54 To me, it felt like, when they looked at it, they were looking at me - no more as a patient...they  
55 were looking at me as a family man; a dad, a husband, an uncle, a brother.... I wasn't just 'that  
56 patient in Room 4'. [patient]  
57  
58  
59

1  
2  
3  
4 One family member referred to how Footprints 'set the tone' for care [sister]. Another described:

5  
6  
7 For me, it was a footprint to what was coming. ...They really want to get to know you and your  
8  
9 family, and they just carried on all the way down...they involved us in everything. [son]  
10

11  
12  
13 Being invited to call the patient by their preferred name, as described by a physiotherapist, started the  
14  
15 relationship on a different footing, offering "permission to be on a different level with the patient".

16  
17 [physiotherapist]  
18  
19

### 20 21 **Motivating the patient** 22

23  
24  
25 Patients and families identified how the whiteboard stimulated the patient's recovery. A partner explained:

26  
27  
28 I feel that it triggered [my husband]. Like...certain things he loves and familiar names and things  
29  
30 like that. It triggers something in their brain to think, 'Oh yeah, I do have that. I do have that to  
31  
32 fight for'. [wife]  
33  
34

35  
36 A patient affirmed the inspirational effect of the whiteboard: "For me, personally, it helped because it gave me  
37  
38 something to wake up to, and gave me something to work towards...It helps with, you know, motivation and  
39  
40 drive and, you know, staying on that road to recovery." [patient]  
41  
42

43  
44 A nurse explained:

45  
46  
47 "It makes you fight with them, whatever struggle they're going through. We had a young woman  
48  
49 who had two young children and every time you'd look at those pictures, you're like, "Come on!  
50  
51 You gotta do it! You gotta do it for these kids!" [nurse]  
52  
53

54  
55 Physiotherapists and respiratory therapists reported using Footprints to incentivize rehabilitation:  
56  
57

1 We use it to kind of distract them and get them thinking about something more positive so,  
2 knowing that they love gardening... like, "Do you buy your plants or do you grow them from  
3 seed?"...it's just really helpful for us in getting more out of the patient because otherwise, when  
4 they're so focused on..."I'm breathing too fast," or "I'm feeling anxious," then we don't get as much  
5 out of them in therapy. So I find that the whiteboard is helpful in getting them to do more than they  
6 thought that they were capable of doing or what we would have been capable of doing if we hadn't  
7 had those cues to kind of ask them and get them engaged." [physiotherapist]  
8  
9  
10  
11  
12  
13  
14  
15

### 16 Humanizing the patient

17 Families perceived that the Footprints Project broadened clinician perspectives. A parent commented:  
18  
19  
20

21 I like it [the whiteboard], because then they know something about her, not that she's just this  
22 person that lays in the bed and doesn't move....that she does have feelings, she does have  
23 things she's enjoyed; she does have a life. Because a lot of people say, 'Well, you know, she  
24 hasn't got much life. She's stuck in a wheelchair.' Hey, this girl's on the go all the time. She  
25 loves karaoke. [mother]  
26  
27  
28  
29  
30  
31  
32  
33  
34  
35

36 A nurse stated, "To know that person, on a personal level, it just makes everything... not easier, but better, in a way  
37 that you kind of can relate to them...to humanize them in a way that you may not have known." [nurse]  
38  
39  
40  
41

42 Whiteboard statements may challenge assumptions.  
43  
44  
45

46 As nurses, we form our own opinions a lot of the time, based on someone's history.... then you can  
47 see on the whiteboard, oh, this person was an artist. Like, we had a really young guy pass away  
48 last week...you can read his history and kind of form your own opinions, or you can go in his room  
49 and see...all the artwork he had and how... artsy and smart and what kind of person he was. I  
50 think that changes it a little bit. [nurse]  
51  
52  
53  
54  
55  
56

57 A resident shared:  
58  
59  
60

1  
2  
3  
4 I actually realized, when I came here... I was getting like, pretty crusty and pretty cold and  
5 removed from patients...And I never intended it to be like that... so...in that sense, that is what  
6 [Footprints] does for you - [it] humanizes the patient.. [resident]  
7  
8  
9

### 10 11 **Informing clinical encounters** 12

13  
14  
15 The Footprints Project was perceived as influencing clinical encounters by helping to **start conversations,**  
16 **foster deeper relationships and guide treatment.**  
17  
18

### 19 20 21 **A conversation-starter** 22

23  
24  
25 Clinicians described using Footprints as a springboard. As relayed by a nurse, “it is a good conversation-starter  
26 with that patient...like, “So, you travelled. I also travel. Let’s talk about traveling while I get you washed up.”  
27

28 [nurse]  
29  
30

31  
32 Giving family members the Footprints Form was considered rapport-building:  
33  
34

35  
36 It is my kind of way [of] building a rapport with them. Like, that’s usually how I introduce myself -  
37 especially if they’re new to the unit... I kind of want to start building that relationship of trust...”We  
38 would like to get to know you”. And usually that’s a good ice breaker, I find. [nurse]  
39  
40  
41  
42

43  
44 A patient's sister described:  
45  
46

47  
48 So I think at first, like, you kind of wonder if there might have been a lot of stigma around him –  
49 you know, just an addict, or whatever, and...I think what [Footprints] triggered was conversation  
50 between us and the healthcare team...you’ve got a structure that helps them focus on the ...  
51 unique things about that person they’re caring for.[sister]  
52  
53  
54  
55

56  
57 A physician expressed:  
58  
59

1  
2  
3  
4 So when that information is there because that someone has taken it from the family...you get to  
5 use that as your leaping off point...If you're like "Oh! I see you like crosswords! Have you done  
6 any crosswords this week?" I think it is interpreted as friendlier too, because when you already  
7 know someone they're more engaged with you as opposed to when you just pick a random  
8 question and hope you're hitting in the right direction. [physician]  
9  
10  
11  
12  
13  
14

### 15 **Fostering deeper relationships**

16  
17  
18  
19 Some clinicians articulated how learning about their patients through Footprints adds another dimension to care:  
20  
21

22  
23 They become less of a patient and more of someone you want to help once you kind of learn a  
24 little bit more about them. I don't know, maybe you get a little bit more, not emotional, but invested  
25 in their care. [respiratory therapist]  
26  
27  
28  
29

30 Families and staff described how the whiteboard influenced connections. A sibling reflected:  
31  
32

33  
34 I think it helped improve and just strengthen the bond...and that trust. Knowing that...my family  
35 member was being cared for – not only on the clinical side but as a human being – that genuine  
36 care of humanity...I think it strengthened the relationship and gave us comfort as well. [sister]  
37  
38  
39  
40  
41

42 One physician shared:  
43  
44

45  
46 It allows me to establish a connection with either the patient or their family members in a more  
47 meaningful way, as well as more quickly...so it's not just the time it would take, but it's the type of  
48 relationship that you might get early on. [physician]  
49  
50  
51  
52

53 Clinicians believed that Footprints facilitates more emotional engagement with patients. Dismissing a  
54 potential concern that this could create inappropriate attachment, one fellow added:  
55  
56  
57  
58  
59  
60

1  
2 I think, if anything, understanding your patient's background better leads to greater job satisfaction  
3  
4 making my job more interesting, sometimes even more fun... [fellow]  
5  
6

### 7 **Guiding treatment**

8  
9

10  
11 Staff indicated how Footprints guides their therapy. One physiotherapist described how knowing more personal  
12 information informs treatment targets:  
13

14  
15  
16  
17 In your mind, when you're working with them, you have a better sense of, like, we're trying to get  
18 you back to your wife and your grandkids that you love so much... You actually can visualize the  
19 goal that you're working towards. [physiotherapist]  
20  
21  
22

23  
24  
25 A respiratory therapist shared:  
26

27  
28 There's been times that they've written on the board that the patient is anxious or claustrophobic  
29 [and] you kind of slow down, like maybe if you're putting someone on BiPAP and you're putting a  
30 big mask on their face and you've just seen that they're claustrophobic, you take that into  
31 account...you slow down and explain things a little bit better. [respiratory therapist]  
32  
33  
34  
35  
36

37  
38 A physiotherapist underscored the utility of knowing a patient's comorbidities and assistive devices (e.g., hearing  
39 aids), "because all of those things might impact how we help them recover... So we can almost cue up the patient  
40 to be as optimized as possible." [physiotherapist]  
41  
42  
43

44  
45 The whiteboard can be useful for goals-of-care meetings to learn more about function, interests, and  
46 family. A nurse highlighted how a conversation about what a patient 'liked and loved and lived' [nurse] was  
47 foundational during the dying process.  
48  
49  
50

51  
52 A resident described how a Footprints Form informed a late-night conversation with a gentleman he met  
53 for the first time:  
54  
55  
56  
57  
58  
59  
60



1 ... [it] really framed the conversation I had next....he loved gardening and now he's here, about to  
2  
3 be on a ventilator... and he was quite elderly...the prognosis was poor. Even though he had been  
4  
5 deteriorating, he understood that. We could have a discussion and we ended up not being  
6  
7 aggressive and he passed away that night, actually. [resident]  
8  
9

### 11 **Influencing professional practice**

12  
13  
14  
15 Footprints was perceived as influencing practice by **refocusing clinician attention on personhood,**  
16  
17 **enhancing interdisciplinary communication, and changing community culture.**  
18  
19

### 21 **Refocusing attention on personhood**

22  
23  
24  
25 A physician found that Footprints can bridge that divide that can develop between patients and clinicians,  
26  
27

28  
29 Because as you move through medicine, it's very easy to get more black and white on the medical  
30  
31 issues and forget everything else. And if you have particularly bad weeks or bad times in the unit,  
32  
33 you can hide behind medical facts... as a protective mechanism for sort of your emotional well-  
34  
35 being... And you try to detach, but stuff like that brings you back to relate to families as a human  
36  
37 being, not as a physician anymore, not as a scientist giving numbers on prognosis. [physician]  
38  
39

40 As described by a nurse, Footprints encourages more intimate, less structured, task-oriented practice:  
41  
42

43  
44 It just becomes so routine and mechanical that you sometimes forget that there's a body and  
45  
46 someone's mother and someone's child sitting in front of you and I think that board brings you  
47  
48 back to, "Oh my God, this is a person. This isn't just a job anymore. Like, I'm actually taking care  
49  
50 of someone's loved one." So, I think it's a really good reminder of that. [nurse]  
51  
52

53 A resident reflected that Footprints helped to refocus on personhood:  
54  
55  
56  
57  
58  
59  
60

1  
2 It's not like you're changing what you're doing, it just has more meaning... it's less like you are  
3  
4 treating numbers. [resident]

### 5 6 7 **Enhancing interdisciplinary communication**

8  
9  
10  
11 Most clinicians discussed how the whiteboard enhances team communication. One physician commented,  
12  
13 "Everybody from the physios to the nurses to speech-language pathologists - it puts us all on the same page in our  
14  
15 common conversation about that patient." [physician]

16  
17  
18  
19 A physician shared how the whiteboard information promoted interdisciplinary exchange:

20  
21  
22  
23 So it's sometimes nice to see, the therapists have written things on the board like you know, "[she]  
24  
25 went 1.5km on the bike today." I wouldn't have otherwise known that to be honest, because I  
26  
27 wouldn't have otherwise looked through the therapy documentation. ...So I think it has helped the  
28  
29 interdisciplinary team approach. [physician]

### 30 31 32 **Changing community culture**

33  
34  
35  
36 Clinicians described how Footprints created an enhanced sense of community, as a physician noted:

37  
38  
39  
40 It's nice to remind people, "hey it's so-and-so's birthday tomorrow or so-and-so's anniversary". It's  
41  
42 nice to hear those vibes through the unit - I think there has been a cultural change. I think it has  
43  
44 changed the unit. [physician]

45  
46  
47  
48 A nurse explained the influence of Footprints in the ICU:

49  
50  
51 We've always asked, "Tell me about them," you know, "What do they like?"... But now it's kind of  
52  
53 like a standard...so, there's more discussions about, I would say, who the person is rather than  
54  
55 [just] what is going on medically. So, I think it's impacted the unit in a good way. [nurse]

1  
2 A fellow who returned to the unit after several years away observed:  
3  
4

5 I definitely think the culture has changed in the last three to four years... There's a lot more  
6 emphasis now on getting to know our patients and the humanism aspect of our medical practice  
7  
8 than there was... It's quite different than the cultures in the other units. [fellow]  
9  
10  
11  
12

### 13 Discussion 14

15  
16  
17 Clinicians working in the ICU may inadvertently forget the 'lives lived' of their patients. The Footprints Project  
18 shares each patient's story or 'footprint' with the healthcare team via the Footprints Form, typically completed by  
19 families to capture personal information (e.g., preferred name and hobbies). Then selected information is  
20 transcribed onto a dedicated Footprints Whiteboard in the room. We documented how Footprints inspired  
21 patients and families, and also sparked the ICU team to further motivate the patient. Footprints enhanced  
22 multidisciplinary exchange by sharing of important information about patients' background, social and family  
23 roles - valued by seriously ill patients (13).  
24  
25  
26  
27  
28  
29  
30  
31

32 Qualitative data indicate more endorsement of Footprints than the quantitative data suggest. Use of the  
33 Footprints Form and Whiteboard was low in the pilot phase, then a 37% absolute increase occurred following  
34 implementation strategies (Audit A: 15% - Audit B: 51%), that was sustained (Audit C: 58%), although personal  
35 whiteboard messages declined, perhaps reflecting the interim introduction of a hospital-wide electronic clinical  
36 information system. Nonetheless, the sustained overall Footprints completion through this transition lends  
37 support to its integration, which remains paper and whiteboard-based rather than web-based. As an inviting  
38 repository of information for patients and families to share with the healthcare team and vice versa, this tactile,  
39 accessible, initiative reportedly stimulated story-telling (14) and re-invigorated partnerships among the staff, and  
40 with patients and families.  
41  
42  
43  
44  
45  
46  
47  
48  
49  
50

51 While potentially serving as a conversation-starter, clinicians cautioned that reading the Footprints tools should  
52 not replace spontaneous, authentic dialogue. While trainee exposure to Footprints was during short clinical  
53 rotations, their reflections resonated with those of permanent clinicians. Exploring the untapped potential of  
54 Footprints as a more deliberate bidirectional communication vehicle, or a tool to foster clinician emotional  
55  
56  
57  
58  
59  
60

1  
2 intelligence (15) would also be worthwhile. In our unit, the Footprints Project complements the 3 Wishes Project,  
3 promoting individualized care at the end-of- life for dying patients and their families (16). However, the Footprints  
4 Project aligns with dignity-conserving care (17) regardless of whether patients survive or succumb.  
5  
6  
7  
8

## 9 **Conclusions**

10  
11  
12  
13 We explored the uptake, sustainability and influence of Footprints Project from patient, family and clinician  
14 perspectives in the ICU. By increasing access to valuable personal information about patients before and  
15 beyond their critical illness through personalized whiteboards at the patient's bedside, the Footprints Project  
16 facilitates holistic, patient-centered care, informs clinical encounters with patients and families, and enhances  
17 interprofessional practice.  
18  
19  
20  
21  
22  
23  
24

## 25 **Acknowledgements**

26 We thank the patients, families and many clinicians who shared their perspectives through interviews and  
27 encouraged us to pursue this work. We value the initial work by Tammy French, RN, which was a cornerstone  
28 of this project. We appreciate the support of Drs. Anne Boyle and Anne Woods, and the professional  
29 transcription assistance of Diana Clancy. We are grateful to Elly Groen, RN for her ongoing volunteer work with  
30 the Footprints Project. This study was funded by a peer review grant from the St. Joseph's Hospital Nursing  
31 Advisory Council (N Hoad) and the Canadian Institutes for Health Research (D Cook). Footprints was supported  
32 by a Hamilton Community Grant from the Walmart Foundation, as well as generous donations from families and  
33 colleagues in the ICU and broader community through fund-raising efforts led by Dr. Michelle Kho, Ms. France  
34 Clarke and Ms. Mary Copland. D Cook holds a Canada Research Chair in Critical Care Knowledge Translation  
35 from the Canadian Institutes of Health Research.  
36  
37  
38  
39  
40  
41  
42  
43  
44  
45  
46  
47

## 48 **Author Contributions:**

49 Concept and design: N Hoad, M Swinton, A Takaoka, B Tam, M Shears, L Waugh, F Toledo, D Cook

50 Acquisition, analysis, or interpretation of data: N Hoad, M Swinton, A Takaoka, B Tam, M Shears, L Waugh, F  
51 Toledo, F Clarke, E Duan, M Soth, D Cook

52 Drafting of the manuscript: N Hoad, M Swinton, A Takaoka, B Tam, M Shears, E Duan, D Cook  
53  
54  
55  
56  
57  
58  
59  
60

1  
2 Critical revision of the manuscript for important intellectual content: N Hoad, M Swinton, A Takaoka, B Tam, M  
3  
4 Shears, L Waugh, F Toledo, F Clarke, E Duan, M Soth, D Cook

5  
6 Statistical analysis: A Takaoka, B Tam, M Shears

7  
8 Obtained funding: N Hoad, D Cook

9  
10 Administrative, technical, or material support: N Hoad, M Swinton, A Takaoka, B Tam, M Shears, L Waugh, F  
11  
12 Toledo, F Clarke, M Soth, D Cook

13  
14 Responsibility for the integrity of the data: N Hoad, D Cook

### 15 16 17 **Competing Interests**

18  
19 N Hoad received a grant from the Nursing Advisory Council of St Joseph's Healthcare Canada and a Walmart  
20  
21 Community Grant. D Cook received a Canada Research Chair from the Canadian Institutes of Health Research  
22  
23 which helped to support this work. Otherwise none of the authors have any competing interests to declare.  
24  
25  
26  
27  
28  
29  
30  
31  
32  
33  
34  
35  
36  
37  
38  
39  
40  
41  
42  
43  
44  
45  
46  
47  
48  
49  
50  
51  
52  
53  
54  
55  
56  
57  
58  
59  
60

Table 1: Footprints Pilot Work and Results

| Phase | Methods                                                                                                                                                                                                                                                                                                     | Results                                                                                                                                                                                                                                                                                                                                                                                                                                                                                                                                                      |
|-------|-------------------------------------------------------------------------------------------------------------------------------------------------------------------------------------------------------------------------------------------------------------------------------------------------------------|--------------------------------------------------------------------------------------------------------------------------------------------------------------------------------------------------------------------------------------------------------------------------------------------------------------------------------------------------------------------------------------------------------------------------------------------------------------------------------------------------------------------------------------------------------------|
| 1     | <ul style="list-style-type: none"> <li>20 semi-structured interviews with ICU staff to generate items for the Footprints Form</li> <li>8 nurses, 2 physicians, 5 respiratory therapists, 2 physiotherapists, 1 chaplain, 1 medical student and 1 research coordinator)</li> </ul>                           | <ul style="list-style-type: none"> <li>Paper-based form was favored</li> <li>Form to be placed in common location (i.e. front of the medical chart)</li> <li>Selected items from Form transcribed onto Whiteboard in the patient's room</li> <li>Photo of the patient encouraged was for the Whiteboard</li> </ul>                                                                                                                                                                                                                                           |
| 2     | <ul style="list-style-type: none"> <li>The Footprints Whiteboards were installed in patient rooms to display essential information from the Footprints Form</li> <li>The Footprints Form was pilot tested with the families of 16 patients</li> </ul>                                                       | <ul style="list-style-type: none"> <li>16 patients aged 48-89 (mean 67.1 years) were included</li> <li>5 families (participation rate 93.8%) completed the form (7 interviewer-administered and 8 self-administered)</li> <li>Whiteboard data: the date, the patient's preferred name, clinician, name of the family spokesperson, aids used at home, milestones in the patient's life, important issues to share, and a message centre for family and ICU team</li> </ul>                                                                                   |
| 3     | <ul style="list-style-type: none"> <li>The Footprints Form and Whiteboard was administered for 26 additional patients</li> <li>Feedback was elicited from family members (verbal and written) and clinicians (verbal)</li> </ul>                                                                            | <ul style="list-style-type: none"> <li>21 families and 30 clinicians (response rates 80.4%, 100%, respectively)</li> <li>Footprints was perceived to foster holistic, personalized care and promote humanism in practice</li> </ul>                                                                                                                                                                                                                                                                                                                          |
| 4     | <ul style="list-style-type: none"> <li>Footprints Form was used by clinicians on the unit for 5 months</li> </ul>                                                                                                                                                                                           | <ul style="list-style-type: none"> <li>During this period, nurses provided Footprints Forms to families of patients admitted to the ICU and updated the whiteboards with selected information provided.</li> </ul>                                                                                                                                                                                                                                                                                                                                           |
| 5     | <ul style="list-style-type: none"> <li>A positive deviance group brainstorming exercise with 16 interdisciplinary colleagues was held</li> <li>Strategies were identified to encourage completion of the Footprints Forms and Whiteboards, and to generate additional implementation suggestions</li> </ul> | <ul style="list-style-type: none"> <li>Several strategies were generated to increase completion (e.g., better accessibility of forms for unit communication clerks and clinicians for distribution, and providing forms in patient rooms and waiting room for families to complete). More results are found in Table 3.</li> </ul>                                                                                                                                                                                                                           |
| 6     | <ul style="list-style-type: none"> <li>A 1 month audit of the form and whiteboard for each patient who had been in the ICU for <math>\geq 48</math> hours was done, regardless of their mechanical ventilation status</li> </ul>                                                                            | <ul style="list-style-type: none"> <li>57 patients audited serving as baseline Audit A</li> <li>Magnets (100%) and markers (98.2%) for the whiteboards were widely available, but the Footprints Form was completed for only 9 (15.8%) of patients</li> <li>Of those 9 patients, 6 (66.7%) had a copy of the Footprints Form hanging from the whiteboard and data from it included on the whiteboard</li> <li>For 48 patients without completed Footprints Forms, today's date and clinician names were recorded on the whiteboard for 34 (70.8%)</li> </ul> |

**Table 2** 10 Footprints Implementation Strategies

| Implementation Strategy                                                                                                                                                                                                           | Description                                                                                                                                                                                                                      |
|-----------------------------------------------------------------------------------------------------------------------------------------------------------------------------------------------------------------------------------|----------------------------------------------------------------------------------------------------------------------------------------------------------------------------------------------------------------------------------|
| 1) Print on brightly coloured green paper                                                                                                                                                                                         | The Footprints Form was printed on bright green paper as a visual prompt.                                                                                                                                                        |
| 2) Involve the unit communication clerk                                                                                                                                                                                           | The unit communication clerks placed the blank Footprints Form in each new patient's chart on admission.                                                                                                                         |
| 3) Make the form available in patient room                                                                                                                                                                                        | Blank Footprints Forms were hung from the Whiteboard with a note attached for families "Please take a form to complete and return to the Nurse".                                                                                 |
| 4) Make the form available in waiting room                                                                                                                                                                                        | The Footprints Forms were also placed in the ICU waiting room inviting family completion.                                                                                                                                        |
| 5) Include in Daily Goals Checklist (19)                                                                                                                                                                                          | A Footprints completion prompt was added to the Daily Goals Checklist.                                                                                                                                                           |
| 6) Share family feedback with nurses via email                                                                                                                                                                                    | A synopsis and stories about Footprints family feedback were periodically emailed to each bedside RN.                                                                                                                            |
| 7) Remind staff about Footprints in ICU Newsletter                                                                                                                                                                                | The Footprints Project was featured in the "Practice Polisher" Newsletter.                                                                                                                                                       |
| 8) Role-modelling use of Footprints in practice                                                                                                                                                                                   | Team members more attentively used the Footprints Form and Whiteboard in practice to encourage uptake                                                                                                                            |
| 8) Include verbal reminders during huddles with bedside staff                                                                                                                                                                     | In small group huddles and ICU walk-about, the research team gave ongoing verbal reminders about Footprints                                                                                                                      |
| 9) Ongoing interprofessional engagement                                                                                                                                                                                           | The research team collaborated with ICU clinicians, Palliative Care and Liaison Psychiatry colleagues for feedback and improvement suggestions.                                                                                  |
| 10) Introduce volunteer to engage families to replace former step*                                                                                                                                                                | Twice weekly, a volunteer (former ICU nurse) checked patient rooms for completed Footprints and Whiteboards, distributing blank forms to family members as needed, encouraging their completion and return to the bedside nurse. |
| *In July 2017, the tenth step was changed from "A reminder will be given to the nurses to distribute the Footprints Form and complete the Whiteboard as part of the ICU safety briefing". to the volunteer-led family engagement. |                                                                                                                                                                                                                                  |

**Table 3** Footprints Form Audit Results

|                                                                | <b>Audit B</b><br>N=70 patients<br>N=247 patient-days | <b>Audit C</b><br>N=64 patients<br>N=242 patient-days | <b>Mean<br/>Difference</b> | <b>95% CI<br/>(P-value)</b> |
|----------------------------------------------------------------|-------------------------------------------------------|-------------------------------------------------------|----------------------------|-----------------------------|
| <b>Number of Audit days/patient</b>                            |                                                       |                                                       |                            |                             |
| Mean (SD)                                                      |                                                       |                                                       |                            |                             |
| Median (IQR)                                                   | 3.5 (1.61)<br>4 (3)                                   | 3.78 (1.47)<br>5 (2)                                  | -0.281                     | -0.811, 0.248<br>(P=0.219)  |
| <b>Footprints Form<sup>a</sup> Completion rate per patient</b> |                                                       |                                                       |                            |                             |
| Full completion, n(%)                                          | 36/70 (51.4)                                          | 37/64 (57.8)                                          | 0.078                      | -0.93, 0.249<br>(P=0.368)   |
|                                                                | 19/70 (27.1)                                          | 11/64 (17.2)                                          | -0.100                     | -0.242, 0.043<br>(P=0.170)  |
| <b>Front Page Completion</b>                                   |                                                       |                                                       |                            |                             |
| Q1- Name, n(%)<br>Add question                                 | 36 (100)                                              | 36 (97.3)                                             | -0.027                     | -0.82, 0.028<br>(P=0.327)   |
| Q2- Language, n(%)                                             | 35 (97.2)                                             | 36 (97.3)                                             | 0.001                      | -0.077, 0.078<br>(P=0.985)  |
| Q3- Grew up, n(%)                                              | 35 (97.2)                                             | 35 (94.6)                                             | -0.026                     | -0.120, 0.067<br>(P=0.578)  |
| Q4- Family members, n(%)                                       | 34 (94.4)                                             | 37 (100)                                              | 0.056                      | -0.021, 0.132<br>P=0.150    |
| Q5- Aids or Devices, n(%)                                      | 32 (88.9)                                             | 32 (86.5)                                             | -0.024                     | -0.180, 0.131<br>(P=0.759)  |
| Q6- Mobility before ICU, n(%)                                  | 33 (91.7)                                             | 34 (91.9)                                             | 0.002                      | -0.128, 0.132<br>(P=0.973)  |
| Q7- Help before ICU, n(%)                                      | 30 (83.3)                                             | 33 (89.2)                                             | 0.086                      | -0.069, 0.240<br>(P=0.272)  |
| <b>Back Page Completion</b>                                    |                                                       |                                                       |                            |                             |
| Q8-Beliefs, values, practices, n(%)                            | 28 (77.8)                                             | 28 (75.7)                                             | -0.021                     | -0.221, 0.179<br>(P=0.835)  |
| Q9- Interests, hobbies, n(%)                                   | 33 (91.7)                                             | 33 (89.2)                                             | -0.025                     | -0.164, 0.114<br>(P=0.724)  |
| Q10- Pets, n(%)                                                | 32 (88.9)                                             | 31 (83.8)                                             | -0.051                     | -0.213, 0.111<br>(P=0.533)  |
| Q11- Roles, n(%)                                               | 32 (88.9)                                             | 27 (73.0)                                             | -0.159                     | -0.342, 0.023<br>(P=0.086)  |
| Q12- Personality, n(%)                                         | 33 (91.7)                                             | 33 (89.2)                                             | -0.025                     | 0.164, 0.114<br>(P=0.724)   |
| Q13- Life events, n(%)                                         | 28 (77.8)                                             | 26 (70.3)                                             | -0.075                     | -0.282, 0.132<br>(P=0.427)  |
| Q14- What matters most, n(%)                                   | 28 (77.8)                                             | 29 (78.4)                                             | 0.006                      | -0.190, 0.202<br>(P=0.951)  |
| Q15- What else, n(%)                                           | 22 (61.1)                                             | 19 (51.4)                                             | -0.098                     | -0.331, 0.136<br>(P=0.408)  |
| Q16- Your Footprint, n(%)                                      | 21 (58.3)                                             | 21 (56.8)                                             | -0.016                     | -0.250, 0.260<br>(P=0.893)  |



**Table 4** Footprints Whiteboard Audit Results

|                                                                | <b>Audit B</b><br>N= 70 patients      | <b>Audit C</b><br>N=64 patients         | <b>Mean<br/>Difference</b> | <b>95% CI<br/>(p-value)</b> |
|----------------------------------------------------------------|---------------------------------------|-----------------------------------------|----------------------------|-----------------------------|
| <b>Static Whiteboard Information</b>                           |                                       |                                         |                            |                             |
| Picture                                                        | 9 (12.8)                              | 8 (12.5)                                | -0.004                     | -0.118, 0.111<br>(P=0.951)  |
| Call me                                                        | 25 (35.7)                             | 38 (59.4)                               | 0.237                      | 0.069, 0.404<br>(P=0.006)   |
| Spokesperson                                                   | 22 (31.4)                             | 32 (50.0)                               | 0.186                      | 0.020, 0.352<br>(P=0.029)   |
| Goals                                                          | 9 (12.8)                              | 2 (3.12)                                | -0.097                     | 0.190 -0.004<br>(P=0.041)   |
| Messages                                                       | 30 (42.9)                             | 15 (23.4)                               | -0.194                     | -0.354, -0.035<br>(P=0.017) |
| About me                                                       | 29 (41.4)                             | 34 (53.1)                               | 0.117                      | -0.054, 0.288<br>(P=0.178)  |
| Average Completion                                             | 29.5%                                 | 33.9%                                   |                            |                             |
| <b>Dynamic Whiteboard Information</b>                          |                                       |                                         |                            |                             |
|                                                                | <b>Audit B</b><br>N= 247 patient-days | <b>Audit C</b><br>N=242 patient<br>days | <b>Mean<br/>Difference</b> | <b>95% CI<br/>(p-value)</b> |
| Date                                                           | 224 (90.7)                            | 217 (89.7)                              | -0.014                     | -0.068, 0.039<br>(P=0.599)  |
| RN                                                             | 223 (90.2)                            | 220 (90.9)                              | 0.002                      | -0.050, 0.055<br>(P=0.937)  |
| MD                                                             | 216 (87.4)                            | 210 (86.8)                              | -0.011                     | -0.071, 0.049<br>(P=0.723)  |
| RT                                                             |                                       |                                         |                            | -0.225, -0.053<br>(P=0.002) |
| <b>Total patient days,</b><br>Audit B, n=247<br>Audit C, n=242 | 169 (68.4)                            | 133 (55.0)                              | -0.139                     |                             |
| <b>Invasive MV days</b><br>Audit B, n=126<br>Audit C, n=160    | 104 (81.9)                            | 101 (63.1)                              |                            |                             |
| PT                                                             |                                       |                                         |                            |                             |
| <b>Weekdays</b><br>Audit B, n=166<br>Audit C, n=198            | 19 (11.4)                             | 25 (12.6)                               |                            |                             |
| Average Completion                                             | 72.32%                                | 68.62%                                  |                            |                             |

**Table 5** Footprints: Implementation Challenges Identified by Clinicians

| Patient/Family Level Challenges                                                  | Clinician Level Challenges                                                                   | System Level Challenges                                                     |
|----------------------------------------------------------------------------------|----------------------------------------------------------------------------------------------|-----------------------------------------------------------------------------|
| Patient too unstable; other care priorities                                      | Clinicians unsure of how to explain form.                                                    | Completed forms not kept in consistent location.                            |
| Patient or family language barrier.<br>Perception that family is too distressed. | Clinicians concern that it won't be well received.                                           | Form and whiteboard completion not considered mandatory or enforced.        |
| Patient has no family or friend available.                                       | Clinicians too busy to hand out or review form or abstract information for whiteboard.       | Considered unnecessary for patients who are able to communicate themselves. |
|                                                                                  | Perceived nursing ownership of the whiteboard; other clinicians reluctant to write on board. | Considered unnecessary for patients with a very short ICU stay.             |

For peer review only

## References

- 1 Koksvisk GH. Silent subjects, loud diseases: Enactment of personhood in intensive care. *Health* 2015;20(2):127-142.
- 2 Chochinov HM, McClement S, Hack T, Thompson G, Dufault B, Harlos M. Eliciting personhood within clinical practice: effects on patients, families, and health care providers. *J Pain Symptom Management* 2015;49(6):973-983.
- 3 Meier DE, Back A, Morrison S. The inner life of physician and care of the seriously ill. *JAMA* 2001;286(23):3007-3014. doi:10.1001/jama.286.23.3007
- 4 Pan J, Chochinov H, Thompson G, McClement S. The TIME Questionnaire: A tool for eliciting personhood and enhancing dignity in nursing homes. *Geriatric Nursing* 2016;37:273-277. <http://dx.doi.org/10.1016/j.gerinurse.2016.03.001>
- 5 Fick DM, DiMeglio B, McDowell JA, Mathis-Halpin J. Do you know your patient? *J Gerontol Nurs* 2013;39(9):2-4. doi:10.3928/00989134-20130809-89.
- 6 Patak L, Gawlinski A, Fung NG, Doering L, Berg J, Henneman EA. Communication boards in critical care: patients' views. *Applied Nursing Research* 19 (2006) 182-190.
- 7 Hoad N, French T, Shears M, Toledo F, Clarke F, Swinton M, Duan E, Waugh L, Soth M, Cook D. Personalizing Care for Critically Ill Patients: The Footprints Project. *Can Crit Care Forum Abstract Book* 2016;A110.
- 8 Hoad N, French T, Shears M, Toledo F, Clarke F, Swinton M, Duan E, Waugh L, Soth M, Cook D. Personalizing Care for Critically Ill Patients: The Footprints Project. *Canadian Critical Care Forum* 2016, Toronto, ON, October 2016 *Can Crit Care Forum Abstract Book* 2016.
- 9 Hoad N, French T, Shears M, Waugh L, Soth M, Lovell O, Toledo F, Boyle A, Cook D. Footprints of Life: Steps in the Development and Implementation of an Interprofessional ICU Initiative to Humanize Health Care. *Niagara Health Quality Symposium Abstract Book* 2016.
- 10 Hsieh HF, Shannon SE. Three approaches to qualitative content analysis. *Qualitative Health Research* 2005;15(9):1277-1288.
- 11 Rodgers BL, Cowles KV. The qualitative research audit trail: A complex collection of documentation. *Research in Nursing & Health* 1993;16(3):219-226.
- 12 Sandelowski M. Whatever happened to qualitative description? *Research in Nursing & Health* 2000;23(1):334-340.
- 13 Abdul-Razzak A, You J, Sherifali D, Simon J, Brazil K. 'Conditional candour' and 'knowing me': an interpretive description study on patient preferences for physician behaviours during end-of-life communication. *BMJ Open* 2014;4:e005653. doi:10.1136/bmjopen-2014-005653
- 14 Moniz T, Lingard L, Watling C. Stories Doctors Tell *JAMA* 2017;318(2):124-125.
- 15 Emanuel EJ, Gudbranson E. Does Medicine Overemphasize IQ? *JAMA* 2018;319(7):651-652.

1  
2 16 Cook DJ, Swinton M, Toledo F, Clarke F, Rose T, Hand-Breckenridge T, Boyle A, Woods A, Zytaruk N,  
3 Heels-Ansdell D, Sheppard RD. Personalizing Death in the ICU: The Three Wishes Project. *Ann Intern Med*  
4 2015;163:271-279. doi:10.7326/M15-0502.  
5

6 17 Chochinov HM. Dignity and the essence of medicine: the A, B, C, and D of dignity conserving care. *BMJ*  
7 2007;335:184-187  
8

9 18 Centofanti J, Duan E, Hoad N, Swinton M, Perri D, Waugh L, Cook DJ. Use of a Daily Goals Checklist for  
10 Morning ICU Rounds: A Mixed-Methods Study. *Crit Care Med* 2014;42:1797–1803.  
11  
12  
13  
14  
15  
16  
17  
18  
19  
20  
21  
22  
23  
24  
25  
26  
27  
28  
29  
30  
31  
32  
33  
34  
35  
36  
37  
38  
39  
40  
41  
42  
43  
44  
45  
46  
47  
48  
49  
50  
51  
52  
53  
54  
55  
56  
57  
58  
59  
60

## Supplementary File 1

Patient Label

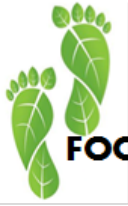

# We'd like to get to know you

To help us provide more personalized care in the ICU, we would like to get to know our patients better. We invite you to answer these questions on behalf of your family member. If you prefer not to share certain information, you can leave spaces blank.

This information will be kept on the chart as a reference for the healthcare team.

We encourage you to **bring in a photo** to display on the whiteboard as well.

**Please return the form to the nurse when complete. Thanks!**

Patient Name: \_\_\_\_\_ ICU Admission Date: \_\_\_\_\_

1. What **name** do you prefer to be called?

\_\_\_\_\_

2. What **language** do you prefer to speak?

\_\_\_\_\_

3. **Where** did you **grow up**?

\_\_\_\_\_

4. **Family members** that we may meet:

\_\_\_\_\_

5. Type of **aids or devices** you use at home:

(e.g., glasses, dentures, hearing aid, CPAP machine, iPad, tablet)

\_\_\_\_\_

6. Level of **mobility before ICU**:

(e.g., independent / no assistance, cane or walker, wheelchair)

\_\_\_\_\_

7. **Help** you needed **before ICU**:

(e.g., driving, cooking, bathing, finances)

\_\_\_\_\_

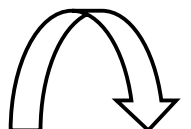

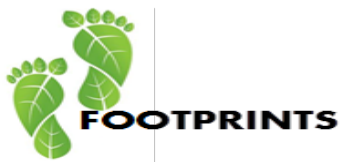

1  
2  
3  
4  
5  
6  
7 **8. Beliefs, values or practices that are spiritual or religious:**  
8  
9

---

10  
11 **9. Interests/Hobbies:**

12 (e.g., TV, reading, music, golf, knitting, woodworking)  
13  
14

---

15  
16 **10. Pets at home:**  
17  
18

---

19  
20 **11. Roles – past or present:**

21 (e.g., parent, volunteer, teacher, caregiver)  
22  
23

---

24  
25 **12. Personality traits:**

26 (e.g., shy, talkative, funny, anxious, claustrophobic)  
27  
28

---

29  
30 **13. Life events:**

31 (e.g., recently married, just retired, grandparent, experienced a loss)  
32  
33

---

34  
35  
36 **14. What matters most to you:**

37 (e.g., physical independence, ability to manage personal matters, comfort)  
38  
39

---

40  
41 **15. What else should we know about you as a person to look after you right now?**  
42  
43

---

44  
45 **16. A little more about your FOOTPRINT -Please add a few key words, phrase or quote**  
46 **that summarizes your views or journey, or what is important to you**  
47  
48

---

49  
50  
51  
52  
53  
54  
55  
56  
57  
58  
59  
60

# Interviews and Focus Groups

10 Clinician Interviews  
25 Clinicians in 4 Focus Groups  
13 Family Members of 10 Families  
5 Patients

# Audit

**Audit A**  
July 2016

**Audit B**  
June 2017

**Audit C**  
May 2018

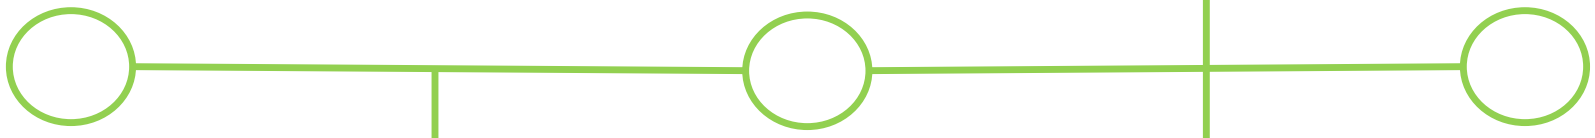

- Implementation Strategies**
1. Green paper
  2. Blank form inclusion in chart
  3. Blank forms hung from white board
  4. Waiting room copies
  5. Incorporation in daily goals checklist
  6. Email updates
  7. Nursing Newsletter
  8. Interprofessional role modeling
  9. Ongoing verbal reminders
  10. Safety briefing highlight ->

- Implementation Strategies**
1. Green paper
  2. Blank form inclusion in chart
  3. Blank forms hung from white board
  4. Waiting room copies
  5. Incorporation in daily goals checklist
  6. Email updates
  7. Nursing Newsletter
  8. Interprofessional role modeling
  9. Ongoing verbal reminders
  - 10. Volunteer 2x/week**

1  
2  
3  
4  
5  
6  
7  
8  
9  
10  
11  
12  
13  
14  
15  
16  
17  
18  
19  
20  
21  
22  
23  
24  
25  
26  
27  
28  
29  
30  
31  
32  
33  
34  
35  
36  
37  
38  
39  
40  
41

## COREQ (CONsolidated criteria for REporting Qualitative research) Checklist

A checklist of items that should be included in reports of qualitative research. You must report the page number in your manuscript where you consider each of the items listed in this checklist. If you have not included this information, either revise your manuscript accordingly before submitting or note N/A.

| Topic                                          | Item No. | Guide Questions/Description                                                                                                                              | Reported on Page No. |
|------------------------------------------------|----------|----------------------------------------------------------------------------------------------------------------------------------------------------------|----------------------|
| <b>Domain 1: Research team and reflexivity</b> |          |                                                                                                                                                          |                      |
| <i>Personal characteristics</i>                |          |                                                                                                                                                          |                      |
| Interviewer/facilitator                        | 1        | Which author/s conducted the interview or focus group?                                                                                                   |                      |
| Credentials                                    | 2        | What were the researcher's credentials? E.g. PhD, MD                                                                                                     |                      |
| Occupation                                     | 3        | What was their occupation at the time of the study?                                                                                                      |                      |
| Gender                                         | 4        | Was the researcher male or female?                                                                                                                       |                      |
| Experience and training                        | 5        | What experience or training did the researcher have?                                                                                                     |                      |
| <i>Relationship with participants</i>          |          |                                                                                                                                                          |                      |
| Relationship established                       | 6        | Was a relationship established prior to study commencement?                                                                                              |                      |
| Participant knowledge of the interviewer       | 7        | What did the participants know about the researcher? e.g. personal goals, reasons for doing the research                                                 |                      |
| Interviewer characteristics                    | 8        | What characteristics were reported about the interviewer/facilitator? e.g. Bias, assumptions, reasons and interests in the research topic                |                      |
| <b>Domain 2: Study design</b>                  |          |                                                                                                                                                          |                      |
| <i>Theoretical framework</i>                   |          |                                                                                                                                                          |                      |
| Methodological orientation and Theory          | 9        | What methodological orientation was stated to underpin the study? e.g. grounded theory, discourse analysis, ethnography, phenomenology, content analysis |                      |
| <i>Participant selection</i>                   |          |                                                                                                                                                          |                      |
| Sampling                                       | 10       | How were participants selected? e.g. purposive, convenience, consecutive, snowball                                                                       |                      |
| Method of approach                             | 11       | How were participants approached? e.g. face-to-face, telephone, mail, email                                                                              |                      |
| Sample size                                    | 12       | How many participants were in the study?                                                                                                                 |                      |
| Non-participation                              | 13       | How many people refused to participate or dropped out? Reasons?                                                                                          |                      |
| <i>Setting</i>                                 |          |                                                                                                                                                          |                      |
| Setting of data collection                     | 14       | Where was the data collected? e.g. home, clinic, workplace                                                                                               |                      |
| Presence of non-participants                   | 15       | Was anyone else present besides the participants and researchers?                                                                                        |                      |
| Description of sample                          | 16       | What are the important characteristics of the sample? e.g. demographic data, date                                                                        |                      |
| <i>Data collection</i>                         |          |                                                                                                                                                          |                      |
| Interview guide                                | 17       | Were questions, prompts, guides provided by the authors? Was it pilot tested?                                                                            |                      |
| Repeat interviews                              | 18       | Were repeat interviews carried out? If yes, how many?                                                                                                    |                      |
| Audio/visual recording                         | 19       | Did the research use audio or visual recording to collect the data?                                                                                      |                      |
| Field notes                                    | 20       | Were field notes made during and/or after the interview or focus group?                                                                                  |                      |
| Duration                                       | 21       | What was the duration of the interviews or focus group?                                                                                                  |                      |
| Data saturation                                | 22       | Was data saturation discussed?                                                                                                                           |                      |
| Transcripts returned                           | 23       | Were transcripts returned to participants for comment and/or                                                                                             |                      |



| Topic                                  | Item No. | Guide Questions/Description                                                                                                        | Reported on Page No. |
|----------------------------------------|----------|------------------------------------------------------------------------------------------------------------------------------------|----------------------|
|                                        |          | correction?                                                                                                                        |                      |
| <b>Domain 3: analysis and findings</b> |          |                                                                                                                                    |                      |
| <i>Data analysis</i>                   |          |                                                                                                                                    |                      |
| Number of data coders                  | 24       | How many data coders coded the data?                                                                                               |                      |
| Description of the coding tree         | 25       | Did authors provide a description of the coding tree?                                                                              |                      |
| Derivation of themes                   | 26       | Were themes identified in advance or derived from the data?                                                                        |                      |
| Software                               | 27       | What software, if applicable, was used to manage the data?                                                                         |                      |
| Participant checking                   | 28       | Did participants provide feedback on the findings?                                                                                 |                      |
| <i>Reporting</i>                       |          |                                                                                                                                    |                      |
| Quotations presented                   | 29       | Were participant quotations presented to illustrate the themes/findings?<br>Was each quotation identified? e.g. participant number |                      |
| Data and findings consistent           | 30       | Was there consistency between the data presented and the findings?                                                                 |                      |
| Clarity of major themes                | 31       | Were major themes clearly presented in the findings?                                                                               |                      |
| Clarity of minor themes                | 32       | Is there a description of diverse cases or discussion of minor themes?                                                             |                      |

Developed from: Tong A, Sainsbury P, Craig J. Consolidated criteria for reporting qualitative research (COREQ): a 32-item checklist for interviews and focus groups. *International Journal for Quality in Health Care*. 2007. Volume 19, Number 6: pp. 349 – 357

**Once you have completed this checklist, please save a copy and upload it as part of your submission. DO NOT include this checklist as part of the main manuscript document. It must be uploaded as a separate file.**

# BMJ Open

## Fostering Humanism: A Mixed Method Evaluation of the Footprints Project in Critical Care

|                                 |                                                                                                                                                                                                                                                                                                                                                                                                                                                                                                                                                                                                                                                                                                                                                                                    |
|---------------------------------|------------------------------------------------------------------------------------------------------------------------------------------------------------------------------------------------------------------------------------------------------------------------------------------------------------------------------------------------------------------------------------------------------------------------------------------------------------------------------------------------------------------------------------------------------------------------------------------------------------------------------------------------------------------------------------------------------------------------------------------------------------------------------------|
| Journal:                        | <i>BMJ Open</i>                                                                                                                                                                                                                                                                                                                                                                                                                                                                                                                                                                                                                                                                                                                                                                    |
| Manuscript ID                   | bmjopen-2019-029810.R1                                                                                                                                                                                                                                                                                                                                                                                                                                                                                                                                                                                                                                                                                                                                                             |
| Article Type:                   | Original research                                                                                                                                                                                                                                                                                                                                                                                                                                                                                                                                                                                                                                                                                                                                                                  |
| Date Submitted by the Author:   | 24-Jul-2019                                                                                                                                                                                                                                                                                                                                                                                                                                                                                                                                                                                                                                                                                                                                                                        |
| Complete List of Authors:       | Hoad, Neala; St Josephs Healthcare Hamilton, Critical Care Swinton, Marilyn; McMaster University, Takaoka, Alyson; McMaster University, Department of Health Research Methods, Evidence and Impact<br>Tam, Benjamin; Niagara Health System, Critical Care<br>Shears, Melissa; Queen's University, Department of Medicine<br>Waugh, Lily; St Josephs Healthcare Hamilton, Critical Care<br>Toledo, Feli; St Josephs Healthcare Hamilton, Critical Care<br>Clarke, France; McMaster University, Department of Health Research Methods, Evidence and Impact<br>Duan, Erick; McMaster University; Niagara Health System<br>Soth, Mark; St Josephs Healthcare Hamilton, Critical Care<br>Cook, Deborah; McMaster University, Department of Health Research Methods, Evidence and Impact |
| <b>Primary Subject Heading</b>: | Intensive care                                                                                                                                                                                                                                                                                                                                                                                                                                                                                                                                                                                                                                                                                                                                                                     |
| Secondary Subject Heading:      | Qualitative research, Nursing                                                                                                                                                                                                                                                                                                                                                                                                                                                                                                                                                                                                                                                                                                                                                      |
| Keywords:                       | Adult intensive & critical care < ANAESTHETICS, Humanism, mixed methods                                                                                                                                                                                                                                                                                                                                                                                                                                                                                                                                                                                                                                                                                                            |
|                                 |                                                                                                                                                                                                                                                                                                                                                                                                                                                                                                                                                                                                                                                                                                                                                                                    |

SCHOLARONE™  
Manuscripts

1  
2  
3 **Fostering Humanism:**  
4 **A Mixed Method Evaluation of the Footprints Project**  
5 **in Critical Care**

6  
7 N Hoad, RN- Corresponding Author  
8 Intensive Care Unit, St. Joseph's Healthcare, Hamilton, Canada  
9 nealahoad@gmail.com

10  
11 M Swinton, MSc  
12 Department of Health Research Methods, Evidence and Impact, McMaster University, Hamilton, Canada  
13 swinton@mcmaster.ca

14  
15 A Takaoka, MSc  
16 Department of Health Research Methods, Evidence and Impact, McMaster University, Hamilton, Canada  
17 takaokam@mcmaster.ca

18  
19 B Tam, MD, MSc  
20 Intensive Care Unit, St. Catharines Site, Niagara Health, Department of Medicine, McMaster University,  
21 Hamilton, Canada  
22 benjaminhltam@gmail.com

23  
24 M Shears, MD  
25 Queens University, Department of Medicine, Kingston Canada  
26 mellshears@gmail.com

27  
28 L Waugh, RN  
29 Intensive Care Unit, St. Joseph's Healthcare, Hamilton, Canada  
30 lwaugh@stjosham.on.ca

31  
32 F Toledo, M Div  
33 Spiritual Care Department, St. Joseph's Healthcare, Hamilton, Canada  
34 ftoledo@stjosham.on.ca

35  
36 F Clarke, RRT  
37 Department of Health Research Methods, Evidence and Impact, McMaster University, Hamilton, Canada  
38 clarkef@mcmaster.ca

39  
40 E Duan, MD  
41 Intensive Care Unit, St. Joseph's Healthcare, Department of Medicine, McMaster University, Hamilton, Canada  
42 erick.duan@medportal.ca

43  
44 M Soth, MD  
45 Intensive Care Unit, St. Joseph's Healthcare, Department of Medicine, McMaster University, Hamilton, Canada  
46 msoth@stjosham.on.ca

47  
48 DJ Cook, MD, MSc  
49 Intensive Care Unit, St. Joseph's Healthcare, Departments of Medicine, Health Research Methods, Evidence  
50 and Impact, McMaster University, Hamilton, Canada  
51 debcook@mcmaster.ca

## Abstract

**Objectives:** The objectives of this mixed-methods study were to assess the uptake, sustainability, and influence of the Footprints Project.

**Setting:** 22-bed university-affiliated ICU in Hamilton, Canada.

**Participants:** ICU patients admitted and their families, as well as clinicians.

**Interventions:** We developed a personalized patient Footprints Form and Whiteboard to facilitate holistic, patient-centered care, to inform clinical encounters, and to create deeper connections among patients, families, and clinicians.

**Outcome Measures:** We conducted 3 audits to examine uptake and sustainability. We conducted semi-structured interviews with 10 clinicians, and held 5 focus groups with 25 clinicians; and we interviewed 5 patients and 13 family representatives of 5 patients who survived and 5 who died in the ICU. Transcripts were analyzed using qualitative content analysis.

**Results:** The Footprints Project facilitated holistic, patient-centered care by setting the stage for patient and family experience, motivating the patient, and humanizing the patient for clinicians. Through informing clinical encounters, Footprints helped clinicians initiate more personal conversations, foster deeper connections and guide treatment. Professional practice influences included more focused attention on the patient, enhanced interdisciplinary communication and changes in community culture. Initially used in 15.8% of patients (Audit A), uptake increased to 51.4% in Audit B, and was sustained at 57.8% in Audit C.

**Conclusions:** By sharing valuable personal information about patients before and beyond their illness on individualized whiteboards at each bedside, the Footprints Project fosters humanism in critical care practice.

### Strengths and limitations of this study:

- Mixed-methods design informed by interdisciplinary engagement, and representative views of patients, family members, and clinicians
- Multi-modal enabling and reminding approach to enhance and sustain uptake

- The Footprints Project supports individualized care at the end-of- life for dying patients and their families, complementing palliative care interventions in our unit such as the 3 Wishes Project, aligning with dignity-conserving care by humanizing patients whether they survive or succumb
- Includes a modest number of patient and family interview
- Clinicians cautioned that reading the Footprints tools should not replace spontaneous, authentic dialogue

N=232 words in abstract

N= 455 words in text

For peer review only

1  
2 “And from there, our conversation begins.....” [Chaplain]  
3  
4

## 5 6 **Introduction**

7  
8  
9 Barriers to patient self-expression can engender a loss of identity, creating distance between patients and  
10 clinicians (1). Difficulty that clinicians may have acknowledging their shared humanity with patients may  
11 contribute to clinician detachment (2). Such disengagement may serve as self-protection while working in an  
12 emotional environment,(3) but attenuate empathy (3).In the intensive care unit (ICU), life-sustaining technologies  
13 causing communication challenges can also dehumanize patients.  
14  
15  
16  
17  
18

19  
20  
21 Information that patients and families want shared with the healthcare team may be revealed by questionnaires,  
22 refocusing attention on personhood. For hospital-based palliative care, Chochinov and colleagues developed the  
23 Patient Dignity Question (PDQ) (2) - a single open-ended question, “What do I need to know about you as a  
24 person to give you the best care possible?” The resulting patient-partnered paragraph is placed on the chart.  
25 Clinicians reported learning something new about patients, influencing care; families recommended using the  
26 PDQ. These investigators developed a 10-item instrument documenting personal attributes called 'This is ME'  
27 (TIME) (4). Most residents canvassed in 6 nursing homes recommended using TIME, and wanted the summary  
28 placed in their chart. Clinicians stated that TIME enhanced their respect and compassion for patients.  
29  
30  
31  
32  
33  
34  
35  
36  
37

38 Communication boards can also express patients' personhood. Gerontology nurses introduced the 'All About Me'  
39 board for persons with dementia unable to speak for themselves (5), offering families the opportunity to express  
40 their loved one's personality and preferences on a board installed in the patient's room. An ICU study found that  
41 conscious patients who offer information to place on their communication board may be more satisfied with care  
42 (6).  
43  
44  
45  
46  
47  
48  
49

50 We developed the Footprints Project to promote the personhood of critically ill patients, hypothesizing this could  
51 be actualized by a combined written tool (Footprints Form) and communication board (Footprints Whiteboard).  
52 The overall goals of the Footprints Project were to facilitate holistic, patient-centered care, inform clinical  
53 encounters, and create deeper connections among patients, families, and clinicians. Building on extensive pilot  
54 work (7-9), we incorporated Footprints into daily practice in the ICU at St. Joseph's Healthcare Hamilton.  
55  
56  
57  
58  
59

1  
2  
3  
4 *\*Table 1 inserted here*

5 The objectives of this study were to assess the 1) uptake, 2) sustainability and 3) influence of the Footprints  
6 Project using both qualitative and quantitative methods.  
7  
8  
9

## 10 **Methods**

### 11 **Setting**

12 The Footprints Project was a nursing-led interprofessional initiative in a 22-bed university-affiliated, medical-  
13 surgical ICU at St. Joseph's Healthcare Hamilton.  
14  
15  
16  
17  
18  
19

### 20 **Intervention**

21 The Footprints Form documents personal information about a patient's story in a structured 16-item  
22 questionnaire completed by family members or friends (or patients, if able) [Supplementary file 1]. The second  
23 component involves transcription of key information from the form onto a dedicated Footprints Whiteboard in  
24 each patient's room. The completed Footprints Form is placed in the medical chart. Both components were  
25 developed following engagement and feedback from key stakeholders, 6-phase pilot testing [Table 1], and  
26 baseline completion measurements (January 2015 - December 2016). Based on low uptake in our pilot audit  
27 (Audit A) (July 2016) and implementation challenges discovered during pilot testing, we introduced 10 strategies  
28 to enhance project uptake (January to July 2017) [Table 2].  
29  
30  
31  
32  
33  
34  
35  
36  
37  
38  
39

40 *\*Table 2 inserted here*

### 41 **Quantitative Methods**

42 Audit B (June 2017) was conducted to evaluate project uptake (Objective 1). We defined successful form and  
43 whiteboard uptake as a statistically significant increase in completion rates between Audits A and B. We chose  
44 this definition for feasibility purposes based on low uptake in pilot data and barriers identified during pilot work  
45 [Table 2]. Audit C (May 2018) was conducted to measure sustainability (Objective 2) and was defined as a  
46 statistically significant increase or no change in completion rates from Audit B to C. Each audit documented  
47 patient data (e.g., mechanical ventilation, length of stay) and Footprints data (e.g., completed questions on the  
48  
49  
50  
51  
52  
53  
54  
55  
56  
57  
58  
59  
60

1 form and transposition of pertinent information onto the whiteboard). We defined a completed form as having  $\geq 1$   
2 question completed. This low threshold was defined to respect the invitational, non-coercive nature of the form,  
3 but typically most questions were completed. Audit A was a 1-day, concealed audit; Audits B and C followed  
4 patients over a  $\leq 5$ -day observation period, informing bedside staff to concurrently elicit feedback.  
5  
6  
7  
8  
9

## 10 **Qualitative Methods**

11 To understand the influence (Objective 3) of the Footprints Project on ICU clinicians, we conducted 10 semi-  
12 structured interviews (10 clinicians) and 5 focus groups (25 clinicians), between Audits B and C. Clinicians  
13 included 3 bedside nurses, 1 charge-nurse, 4 physiotherapists, 2 respiratory therapists, 2 chaplains, 1 clerk and  
14 12 physicians (5 fellows, 4 residents, 3 intensivists). We used purposive sampling to identify interdisciplinary  
15 clinicians working in the ICU for  $\geq 1$  year (except trainees), inviting participation by email. All invited clinicians  
16 participated.  
17  
18  
19  
20  
21  
22  
23  
24  
25

26 To explore the influence of the Footprints Project on the experience of patients and family members, we  
27 interviewed 5 survivors on the ward and 13 family members of 10 different patients (5 families of survivors and 5  
28 families of decedents). Selection criteria were English-speaking patients in ICU for  $\geq 1$  week with completed  
29 whiteboards. Participation was by telephone or in-person. All invited patients and families participated. We  
30 conducted interviews until data saturation was reached and no further themes emerged in our analysis.  
31  
32  
33  
34  
35  
36  
37

38 A lead researcher with qualitative methods training who does not work in the ICU (MS) and had no prior  
39 relationship with participants conducted interviews and focus groups in a hospital office or conference room; one  
40 family member was interviewed by telephone. A nurse (NH) and physician (DC) with qualitative methods training  
41 interviewed 5 patients they previously cared for. Semi-structured interview and focus group guides were used;  
42 each interviewer kept field notes from the focus groups and interviews. Interviews and focus groups were  
43 digitally recorded, transcribed and anonymized.  
44  
45  
46  
47  
48  
49  
50  
51

52 See [Supplementary file 2](#) for a timeline of quantitative and qualitative activities.  
53  
54  
55  
56  
57  
58  
59  
60



## Analysis

We assessed uptake by calculating the proportion of completed Footprints activities in Audit B (e.g., completion of the form, information transposed onto the whiteboard) to Audit A. Whiteboard data was analyzed in two information categories: dynamic (information updated daily, i.e. date, nurse, physician, respiratory therapist, and physiotherapist) with a denominator of total patient audit days, or static (information that remained constant over the ICU stay, i.e. presence of photos, patient name, spokesperson, goals, messages, about me) with a denominator of total patients. We evaluated sustainability by comparing the proportion of completed Footprints activities between Audits B and C using Pearson's Chi square ( $\chi^2$ ) test with a significance level of  $p < 0.05$ . All statistics were conducted in SPSS (IBM Corp. Released 2016. IBM SPSS Statistics for Windows, Version 24.0. Armonk, NY: IBM Corp.)

For interview and focus group data, conventional content analysis was used, whereby codes are derived directly from the data without preconceived categories or theoretical perspectives (11), yielding a descriptive summary of findings, consistent with qualitative description (12). Three investigators completed line-by-line open coding of 1 focus group and 5 interview transcripts, discussed resulting codes, and developed the preliminary coding list. Remaining transcripts were coded by a single investigator using an audit trail documenting changes (13); the coding structure evolved during team consensus meetings. N'Vivo (V 11.0) was used for data management. We held an off-site member-checking event with 10 interprofessional colleagues who were not previously interviewed to share qualitative results and verify whether findings accurately reflected their experiences and perceptions of the Footprints Project.

## Ethics

The Hamilton Integrated Research Ethics Board approved this study (Project # 3214). Written informed consent was obtained from all participants.

## Results

### Quantitative Results: *Uptake & Sustainability*

Reflecting the pilot phase, Audit A showed use of the Footprints form and whiteboard for 9/57 patients (15.8%) Following 10 implementation strategies, form completion increased significantly (Audit B, 36/70 patients, 51.4%) ( $p < 0.001$ ). Overall form completion rate was sustained between Audits B (51.4%) and C (37/64 patients, 57.8%) ( $p = 0.604$ ) [Table 3]. Using patient-days in Audits B ( $n = 242$ ) and C ( $n = 247$ ), there were no significant differences in dynamic information completion except for a decrease in names of respiratory therapists ( $p = 0.002$ ). For patients in Audits B ( $n = 70$ ) and C ( $n = 64$ ), some static whiteboard data completion rates were unchanged; however, messages, spokesperson, and daily goals on the board declined [Table 4].

*\*Table 3 and Table 4 inserted here*

### Qualitative Results: *Uptake & Sustainability*

The uptake and sustainability of the Footprints project were discussed during the focus groups and interviews. Initially, clinician views on Footprints utilization reflected inconsistent uptake:

I think it's also to do with modeling ... So, for example, nobody is even bothering to look at this whiteboard, the nurses are not bringing it up. You, as a team, are completely disconnected from it whether it's filled out well or not....If [physician name] is on, of course, or, if [RN names] are at the bedside...the reminders are going to be there. [fellow]

Clinicians identified implementation challenges which we grouped into patient, clinician and system-level barriers [Table 5]. Clinicians expressed how gradually, the Footprints Project became integrated into practice.

*\*Table 5 inserted here*

One physiotherapist shared: "I totally believe it's sustainable. It's become core. It's certainly become an important part of how I function from day to day in the ICU." [physiotherapist]

1  
2 A physician described:  
3  
4

5  
6 "It's common place now, for there to be not just something on the board but something in the room that's important  
7 to, or comforts, that person, whereas I think that used to be more the exception and not the standard. I think what  
8 [Footprints] does is it makes establishing that understanding of the patient as an expectation... So instead of when  
9 it's been there, seeing it as a bonus, when it's not there, it's seen as the exception." [physician]  
10  
11  
12  
13  
14

### 15 **Qualitative Results: Influence**

16  
17  
18  
19 Patients and family members described how Footprints influenced their experience. Clinicians reported diverse  
20 purposes of the Footprints Project, with beneficial consequences. The themes and subthemes from the analysis of the  
21 qualitative data on influence are illustrated in [Supplementary File 3](#).  
22  
23  
24  
25  
26

#### 27 **A. Facilitating holistic, patient-centered care**

28  
29  
30 The Footprints Project **sets the stage for the patient and family, motivates the patient, and humanizes the**  
31 **patient for clinicians.**  
32  
33  
34  
35

##### 36 ***i) Setting the stage***

37  
38  
39 A patient shared feeling respected as an individual to have the team know personal information about him:  
40  
41  
42  
43

44 To me, it felt like, when they looked at it, they were looking at me - no more as a patient...they  
45 were looking at me as a family man; a dad, a husband, an uncle, a brother.... I wasn't just 'that  
46 patient in Room 4'. [patient]  
47  
48  
49  
50

51 One family member referred to how Footprints 'set the tone' for care [sister]. Another described:  
52  
53  
54

55 For me, it was a footprint to what was coming....They really want to get to know you and your  
56 family, and they just carried on all the way down...they involved us in everything. [son]  
57  
58  
59  
60

1  
2  
3  
4 Being invited to call the patient by their preferred name, as described by a physiotherapist, started the  
5 relationship on a different footing, offering "permission to be on a different level with the patient".

6  
7 [physiotherapist]  
8  
9

## 10 11 **ii) Motivating the patient** 12 13

14  
15 Patients and families identified how the whiteboard stimulated the patient's recovery. A partner explained:  
16  
17

18  
19 I feel that it triggered [my husband]. Like...certain things he loves and familiar names and things  
20 like that. It triggers something in their brain to think, 'Oh yeah, I do have that. I do have that to  
21 fight for'. [wife]  
22  
23  
24  
25

26  
27 A patient affirmed the inspirational effect of the whiteboard: "For me, personally, it helped because it gave me  
28 something to wake up to, and gave me something to work towards...It helps with, you know, motivation and  
29 drive and, you know, staying on that road to recovery." [patient]  
30  
31  
32

33  
34 A nurse explained how whatever struggle patients are going through,  
35  
36

37  
38 It makes you fight with them... We had a young woman who had two young children and every  
39 time you'd look at those pictures, you're like, 'Come on! You gotta do it! You gotta do it for these  
40 kids!' [nurse]  
41  
42  
43  
44  
45

46 Physiotherapists and respiratory therapists reported using Footprints to incentivize rehabilitation:  
47  
48

49  
50 We use it to kind of distract them and get them thinking about something more positive so,  
51 knowing that they love gardening... like, 'Do you buy your plants or do you grow them from  
52 seed?'...it's just really helpful for us in getting more out of the patient because otherwise, when  
53 they're so focused on...'I'm breathing too fast,' or 'I'm feeling anxious,' then we don't get as much  
54 out of them in therapy. So I find that the whiteboard is helpful in getting them to do more than they  
55  
56  
57  
58  
59

1  
2 thought that they were capable of doing or what we would have been capable of doing if we hadn't  
3  
4 had those cues to kind of ask them and get them engaged. [physiotherapist]  
5  
6

### 7 **iii) Humanizing the patient**

8  
9

10  
11 Families perceived that the Footprints Project broadened clinician perspectives. A parent commented:  
12  
13

14  
15 I like it [the whiteboard], because then they know something about her, not that she's just this  
16 person that lays in the bed and doesn't move...that she does have feelings, she does have  
17 things she's enjoyed; she does have a life. Because a lot of people say, 'Well, you know, she  
18 hasn't got much life. She's stuck in a wheelchair.' Hey, this girl's on the go all the time. She  
19 loves karaoke. [mother]  
20  
21  
22  
23  
24

25  
26  
27 A nurse stated, "To know that person, on a personal level, it just makes everything... not easier, but better, in a way  
28 that you kind of can relate to them...to humanize them in a way that you may not have known." [nurse]  
29  
30

31  
32 Whiteboard statements may challenge assumptions.  
33  
34

35  
36 As nurses, we form our own opinions a lot of the time, based on someone's history.... then you can  
37 see on the whiteboard, oh, this person was an artist. Like, we had a really young guy pass away  
38 last week...you can read his history and kind of form your own opinions, or you can go in his room  
39 and see...all the artwork he had and how... artsy and smart and what kind of person he was. I  
40 think that changes it a little bit. [nurse]  
41  
42  
43  
44  
45  
46

47  
48 A resident shared:  
49  
50

51  
52 I actually realized, when I came here... I was getting like, pretty crusty and pretty cold and  
53 removed from patients...And I never intended it to be like that... so...in that sense, that is what  
54 [Footprints] does for you - [it] humanizes the patient.. [resident]  
55  
56  
57  
58  
59  
60

## **B. Informing clinical encounters**

The Footprints Project was perceived as influencing clinical encounters by helping to **start conversations, foster deeper relationships, and guide treatment.**

### ***i) A conversation-starter***

Clinicians described using Footprints as a springboard. As relayed by a nurse, “it is a good conversation-starter with that patient...like, ‘So, you travelled. I also travel. Let’s talk about traveling while I get you washed up.’”

[nurse]

Giving family members the Footprints Form was considered a way to build rapport with families:

Like, that's usually how I introduce myself - especially if they're new to the unit... I kind of want to start building that relationship of trust...‘We would like to get to know you’. And usually that's a good ice breaker, I find. [nurse]

A patient's sister described:

So I think at first, like, you kind of wonder if there might have been a lot of stigma around him – you know, just an addict, or whatever, and...I think what [Footprints] triggered was conversation between us and the healthcare team...you’ve got a structure that helps them focus on the ... unique things about that person they’re caring for. [sister]

A physician expressed the utility of information taken directly from the family:

You get to use that as your leaping off point...If you’re like ‘Oh! I see you like crosswords! Have you done any crosswords this week?’ I think it is interpreted as friendlier too, because when you already know someone they’re more engaged with you as opposed to when you just pick a random question and hope you’re hitting in the right direction. [physician]

1  
2  
3  
4 **ii) Fostering deeper relationships**  
5  
6  
7

8 Some clinicians articulated how learning about their patients through Footprints adds another dimension to care:  
9

10  
11 They become less of a patient and more of someone you want to help once you kind of learn a  
12 little bit more about them. I don't know, maybe you get a little bit more, not emotional, but invested  
13 in their care. [respiratory therapist]  
14  
15  
16  
17

18  
19 Families and staff described how the whiteboard influenced connections. A sibling reflected:  
20

21  
22  
23 I think it helped improve and just strengthen the bond...and that trust. Knowing that...my family  
24 member was being cared for – not only on the clinical side but as a human being – that genuine  
25 care of humanity...I think it strengthened the relationship and gave us comfort as well. [sister]  
26  
27  
28  
29

30  
31 One physician shared:  
32

33  
34 It allows me to establish a connection with either the patient or their family members in a more  
35 meaningful way, as well as more quickly...so it's not just the time it would take, but it's the type of  
36 relationship that you might get early on. [physician]  
37  
38  
39  
40  
41

42 Clinicians believed that Footprints facilitates more emotional engagement with patients. Dismissing a  
43 potential concern that this could create inappropriate attachment, one fellow added: "I think, if anything,  
44 understanding your patient's background better leads to greater job satisfaction making my job more  
45 interesting, sometimes even more fun..." [fellow]  
46  
47  
48  
49  
50

51 **iii) Guiding treatment**  
52  
53  
54

55 Staff indicated how Footprints guides their therapy. One physiotherapist described how knowing more personal  
56 information informs treatment targets:  
57  
58

1  
2  
3  
4 In your mind, when you're working with them, you have a better sense of, like, we're trying to get  
5 you back to your wife and your grandkids that you love so much... You actually can visualize the  
6 goal that you're working towards. [physiotherapist]  
7  
8  
9  
10

11 A respiratory therapist shared:

12  
13  
14  
15 There's been times that they've written on the board that the patient is anxious or claustrophobic  
16 [and] you kind of slow down, like maybe if you're putting someone on BiPAP and you're putting a  
17 big mask on their face and you've just seen that they're claustrophobic, you take that into  
18 account...you slow down and explain things a little bit better. [respiratory therapist]  
19  
20  
21  
22  
23  
24

25 A physiotherapist underscored the utility of knowing a patient's comorbidities and assistive devices (e.g., hearing  
26 aids), "because all of those things might impact how we help them recover... So we can almost cue up the patient  
27 to be as optimized as possible." [physiotherapist]  
28  
29  
30  
31

32 The whiteboard can be useful for goals-of-care meetings to learn more about function, interests, and  
33 family. A nurse highlighted how a conversation about what a patient 'liked and loved and lived' [nurse] was  
34 foundational during the dying process.  
35  
36  
37  
38  
39

40 A resident described how a Footprints Form informed a late-night conversation with a gentleman he met  
41 for the first time:  
42  
43  
44  
45

46 ... [it] really framed the conversation I had next...he loved gardening and now he's here, about to  
47 be on a ventilator... and he was quite elderly...the prognosis was poor. Even though he had been  
48 deteriorating, he understood that. We could have a discussion and we ended up not being  
49 aggressive and he passed away that night, actually. [resident]  
50  
51  
52  
53  
54  
55  
56  
57  
58  
59  
60



### **C. Influencing professional practice**

Footprints was perceived as influencing practice by **refocusing clinician attention on personhood, enhancing interdisciplinary communication, and changing community culture.**

#### ***i) Refocusing attention on personhood***

A physician found that Footprints can bridge that divide that can develop between patients and clinicians,

Because as you move through medicine, it's very easy to get more black and white on the medical issues and forget everything else. And if you have particularly bad weeks or bad times in the unit, you can hide behind medical facts... as a protective mechanism for sort of your emotional well-being... And you try to detach, but stuff like that brings you back to relate to families as a human being, not as a physician anymore, not as a scientist giving numbers on prognosis. [physician]

As described by a nurse, Footprints encourages more intimate, less structured, task-oriented practice:

It just becomes so routine and mechanical that you sometimes forget that there's a body and someone's mother and someone's child sitting in front of you and I think that board brings you back to, 'Oh my God, this is a person. This isn't just a job anymore. Like, I'm actually taking care of someone's loved one.' So, I think it's a really good reminder of that. [nurse]

A resident reflected that Footprints helped to refocus on personhood, "It's not like you're changing what you're doing, it just has more meaning... it's less like you are treating numbers." [resident]

#### ***ii) Enhancing interdisciplinary communication***

Most clinicians discussed how the whiteboard enhances team communication. One physician commented, "Everybody from the physios to the nurses to speech-language pathologists - it puts us all on the same page in our common conversation about that patient." [physician]

1  
2  
3  
4 A physician shared how the whiteboard information promoted interdisciplinary exchange:  
5  
6

7 So it's sometimes nice to see, the therapists have written things on the board like you know, '[she]  
8 went 1.5km on the bike today.' I wouldn't have otherwise known that to be honest, because I  
9 wouldn't have otherwise looked through the therapy documentation. ...So I think it has helped the  
10 interdisciplinary team approach. [physician]  
11  
12  
13  
14  
15

### 16 17 **iii) Changing community culture** 18

19  
20  
21 Clinicians described how Footprints created an enhanced sense of community, as a physician noted:  
22  
23

24 It's nice to remind people, 'hey it's so-and-so's birthday tomorrow or so-and-so's anniversary'. It's  
25 nice to hear those vibes through the unit - I think there has been a cultural change. I think it has  
26 changed the unit. [physician]  
27  
28  
29  
30

31  
32 A nurse explained the influence of Footprints in the ICU:  
33  
34

35  
36 We've always asked, 'Tell me about them,' you know, "What do they like?..." But now it's kind of  
37 like a standard...so, there's more discussions about, I would say, who the person is rather than  
38 [just] what is going on medically. So, I think it's impacted the unit in a good way. [nurse]  
39  
40  
41  
42  
43

44 A fellow who returned to the unit after several years away observed:  
45  
46

47 I definitely think the culture has changed in the last three to four years...There's a lot more  
48 emphasis now on getting to know our patients and the humanism aspect of our medical practice  
49 than there was... It's quite different than the cultures in the other units. [fellow]  
50  
51  
52  
53  
54  
55  
56  
57  
58  
59  
60

## Discussion

Clinicians working in the ICU may inadvertently forget the 'lives lived' of their patients. The Footprints Project shares each patient's story or 'footprint' with the healthcare team via the Footprints form, typically completed by families to capture personal information (e.g., preferred name and hobbies). Then selected information is transcribed onto a dedicated Footprints whiteboard in the room. We documented how Footprints inspired patients and families, and also sparked the ICU team to further motivate the patient. Footprints enhanced multidisciplinary exchange by sharing of important information about patients' background, social, and family roles - valued by seriously ill patients (14).

Qualitative data indicate more endorsement of Footprints than the quantitative data suggest. Use of the Footprints form and whiteboard was low in the pilot phase, then a 37% absolute increase in form completion occurred following implementation strategies (Audit A: 15% - Audit B: 51%), that was sustained (Audit C: 58%), although personal whiteboard messages, spokesperson, and daily goals declined, perhaps reflecting the interim introduction of a hospital-wide electronic clinical information system. Nonetheless, the sustained overall Footprints completion through this transition lends support to its integration, which remains paper and whiteboard-based rather than web-based. As an inviting repository of information for patients and families to share with the healthcare team and vice versa, this tactile, accessible, initiative reportedly stimulated story-telling (15) and re-invigorated partnerships among the staff, and with patients and families.

If dignity represents the inherent worth of all human beings, and respect represents the actions that appropriately honor and acknowledge such dignity (16,17), this conceptualization can facilitate identification of concrete, observable behaviors of respectful and disrespectful care (18). As such, many participants in this study considered the Footprints Project as an intervention promoting respectful care, aligned with the definition that respect is recognition of the unconditional value of patients as persons (19).

Limitations of this study include a modest number of patient and family interviews. While trainee exposure to Footprints was during short clinical rotations, their reflections resonated with those of permanent clinicians. While potentially serving as a conversation-starter, clinicians cautioned that reading the Footprints tools should not replace spontaneous, authentic dialogue. Clinician impressions about how Footprints has influenced the

1  
2 culture of the unit does not imply causality, nor does vernacular use of the term 'culture' indicate a validated  
3 sociologic construct.  
4

5  
6  
7 Strengths of this study include the mixed-methods design informed by interdisciplinary engagement, and  
8 representative views of patients, family members, and clinicians. We used a multi-modal enabling and reminding  
9 approach to enhance and sustain uptake. The Footprints Project also supports individualized care at the end-of-  
10 life for dying patients and their families, complementing palliative care interventions in our unit such as the 3  
11 Wishes Project (20), aligning with dignity-conserving care (21) humanizing patients whether they survive or  
12 succumb.  
13  
14  
15  
16  
17  
18  
19  
20

21 A recent systematic review (22) focused on the effect of humanized care of critically ill patients on empathy  
22 among healthcare professionals, anxiety among relatives, and burnout and compassion fatigue in both groups,  
23 Galvin and colleagues identified 12 studies addressing 4 interventions (liberal visitation, diaries, family  
24 participation in basic care, and witnessed resuscitation) and 1 mixed intervention. Of 12 studies, 11 were at high  
25 risk of bias, 10 measured anxiety among 1,055 relatives, 2 measured burnout in 288 ICU professionals, and  
26 none addressed empathy or compassion fatigue. The effect of humanizing interventions on any of these  
27 psychologic outcomes was not quantifiable, but reviewers identified a trend towards reduced anxiety among  
28 families participating in basic patient care, liberal visitation, and diary keeping; the effects of liberal visitation on  
29 burnout among clinicians was conflicting. This review underscores the potential for this domain of inquiry.  
30  
31  
32  
33  
34  
35  
36  
37

### 38 **Further Research**

39  
40 Whether the Footprints Project results are generalizable to other wards or jurisdictions merits further evaluation.  
41 Exploring the untapped potential of Footprints as a more deliberate bidirectional communication vehicle, or a tool  
42 to foster clinician emotional intelligence (23) would also be worthwhile.  
43  
44  
45  
46  
47

### 48 **Public and Patient Involvement**

49  
50 The motivation for this project was humanizing members of the public when they are technologically  
51 dependent in the ICU; in this sense, the public motivated the aims of our research. We sought direct input from  
52 patients and families about the Footprints Form and Whiteboard through interviews, thereby eliciting advice  
53 about their content and format. We solicited their views about whether and how the Footprints Project  
54 influenced their experience in the ICU. Their voices motivated us to continue with the Footprints Project. After  
55  
56  
57  
58  
59

1  
2 sharing the preliminary results locally, final study results will be shared with clinicians at local interprofessional  
3  
4 rounds and scientific meetings.  
5  
6  
7  
8

## 9 **Conclusions**

10 We explored the uptake, sustainability and influence of Footprints Project from patient, family and clinician  
11 perspectives in the ICU. By increasing access to valuable personal information about patients before and  
12 beyond their critical illness through personalized whiteboards at the patient's bedside, the Footprints Project  
13 facilitates holistic, patient-centered care, informs clinical encounters with patients and families, and enhances  
14 interprofessional practice.  
15  
16  
17  
18  
19  
20  
21  
22

## 23 **Acknowledgements**

24 We thank the patients, families and many clinicians who shared their perspectives through interviews and  
25 encouraged us to pursue this work. We value the initial work by Tammy French, RN, which was a cornerstone  
26 of this project. We appreciate the support of Drs. Anne Boyle and Anne Woods, and the professional  
27 transcription assistance of Diana Clancy. We are grateful to Elly Groen, RN for her ongoing volunteer work with  
28 the Footprints Project. This study was funded by a peer review grant from the St. Joseph's Hospital Nursing  
29 Advisory Council (N Hoad) and the Canadian Institutes for Health Research (D Cook). Footprints was supported  
30 by a Hamilton Community Grant from the Walmart Foundation, as well as generous donations from families and  
31 colleagues in the ICU and broader community through fund-raising efforts led by Dr. Michelle Kho, Ms. France  
32 Clarke and Ms. Mary Copland. D Cook holds a Canada Research Chair in Critical Care Knowledge Translation  
33 from the Canadian Institutes of Health Research.  
34  
35  
36  
37  
38  
39  
40  
41  
42  
43  
44  
45  
46  
47  
48  
49

## 50 **Funding Statement**

51 This study was funded by the Nursing Advisory Council of St Joseph's Healthcare Hamilton and the Canadian  
52 Institutes of Health Research.  
53  
54  
55  
56

## 57 **Role of the Sponsor**

1  
2 The sponsors had no role in the design, conduct, interpretation or write-up of this study.  
3  
4

### 5 6 **Data Sharing**

7 De-identified data will be available upon request and research ethics board approval.  
8  
9

### 10 11 **Transparency Declaration**

12  
13 The information and findings contained in this manuscript represent an honest, accurate and transparent  
14  
15 account of the study. No aspects have been omitted and any discrepancies have been explained.  
16  
17

### 18 19 20 21 **Author Contributions:**

22  
23 Concept and design: N Hoad, M Swinton, A Takaoka, B Tam, M Shears, L Waugh, F Toledo, D Cook

24  
25 Acquisition, analysis, or interpretation of data: N Hoad, M Swinton, A Takaoka, B Tam, M Shears, L Waugh, F  
26  
27 Toledo, F Clarke, E Duan, M Soth, D Cook

28  
29 Drafting of the manuscript: N Hoad, M Swinton, A Takaoka, B Tam, M Shears, E Duan, D Cook

30  
31 Critical revision of the manuscript for important intellectual content: N Hoad, M Swinton, A Takaoka, B Tam, M  
32  
33 Shears, L Waugh, F Toledo, F Clarke, E Duan, M Soth, D Cook

34  
35 Statistical analysis: A Takaoka, B Tam, M Shears

36  
37 Obtained funding: N Hoad, D Cook

38  
39 Administrative, technical, or material support: N Hoad, M Swinton, A Takaoka, B Tam, M Shears, L Waugh, F  
40  
41 Toledo, F Clarke, M Soth, D Cook

42  
43 Responsibility for the integrity of the data: N Hoad, D Cook  
44  
45  
46  
47  
48  
49

### 50 51 **Competing Interests**

52  
53 N Hoad received a grant from the Nursing Advisory Council of St Joseph's Healthcare Canada and a Walmart  
54  
55 Community Grant. D Cook received a Canada Research Chair from the Canadian Institutes of Health Research  
56  
57 which helped to support this work. Otherwise none of the authors have any competing interests to declare.  
58  
59

**Table 1: Footprints Pilot Work and Results**

| Phase | Methods                                                                                                                                                                                                                                                                                                     | Results                                                                                                                                                                                                                                                                                                                                                                                                                                                                                                                                                      |
|-------|-------------------------------------------------------------------------------------------------------------------------------------------------------------------------------------------------------------------------------------------------------------------------------------------------------------|--------------------------------------------------------------------------------------------------------------------------------------------------------------------------------------------------------------------------------------------------------------------------------------------------------------------------------------------------------------------------------------------------------------------------------------------------------------------------------------------------------------------------------------------------------------|
| 1     | <ul style="list-style-type: none"> <li>20 semi-structured interviews with ICU staff to generate items for the Footprints Form</li> <li>8 nurses, 2 physicians, 5 respiratory therapists, 2 physiotherapists, 1 chaplain, 1 medical student and 1 research coordinator)</li> </ul>                           | <ul style="list-style-type: none"> <li>Paper-based form was favored</li> <li>Form to be placed in common location (i.e. front of the medical chart)</li> <li>Selected items from Form transcribed onto Whiteboard in the patient's room</li> <li>Photo of the patient encouraged was for the Whiteboard</li> </ul>                                                                                                                                                                                                                                           |
| 2     | <ul style="list-style-type: none"> <li>The Footprints Whiteboards were installed in patient rooms to display essential information from the Footprints Form</li> <li>The Footprints Form was pilot tested with the families of 16 patients</li> </ul>                                                       | <ul style="list-style-type: none"> <li>16 patients aged 48-89 (mean 67.1 years) were included</li> <li>5 families (participation rate 93.8%) completed the form (7 interviewer-administered and 8 self-administered)</li> <li>Whiteboard data: the date, the patient's preferred name, clinician, name of the family spokesperson, aids used at home, milestones in the patient's life, important issues to share, and a message centre for family and ICU team</li> </ul>                                                                                   |
| 3     | <ul style="list-style-type: none"> <li>The Footprints Form and Whiteboard was administered for 26 additional patients</li> <li>Feedback was elicited from family members (verbal and written) and clinicians (verbal)</li> </ul>                                                                            | <ul style="list-style-type: none"> <li>21 families and 30 clinicians (response rates 80.4%, 100%, respectively)</li> <li>Footprints was perceived to foster holistic, personalized care and promote humanism in practice</li> </ul>                                                                                                                                                                                                                                                                                                                          |
| 4     | <ul style="list-style-type: none"> <li>Footprints Form was used by clinicians on the unit for 5 months</li> </ul>                                                                                                                                                                                           | <ul style="list-style-type: none"> <li>During this period, nurses provided Footprints Forms to families of patients admitted to the ICU and updated the whiteboards with selected information provided.</li> </ul>                                                                                                                                                                                                                                                                                                                                           |
| 5     | <ul style="list-style-type: none"> <li>A positive deviance group brainstorming exercise with 16 interdisciplinary colleagues was held</li> <li>Strategies were identified to encourage completion of the Footprints Forms and Whiteboards, and to generate additional implementation suggestions</li> </ul> | <ul style="list-style-type: none"> <li>Several strategies were generated to increase completion (e.g., better accessibility of forms for unit communication clerks and clinicians for distribution, and providing forms in patient rooms and waiting room for families to complete). More results are found in Table 3.</li> </ul>                                                                                                                                                                                                                           |
| 6     | <ul style="list-style-type: none"> <li>A 1 month audit of the form and whiteboard for each patient who had been in the ICU for <math>\geq 48</math> hours was done, regardless of their mechanical ventilation status</li> </ul>                                                                            | <ul style="list-style-type: none"> <li>57 patients audited serving as baseline Audit A</li> <li>Magnets (100%) and markers (98.2%) for the whiteboards were widely available, but the Footprints Form was completed for only 9 (15.8%) of patients</li> <li>Of those 9 patients, 6 (66.7%) had a copy of the Footprints Form hanging from the whiteboard and data from it included on the whiteboard</li> <li>For 48 patients without completed Footprints Forms, today's date and clinician names were recorded on the whiteboard for 34 (70.8%)</li> </ul> |

**Table 2 10 Footprints Implementation Strategies**

| Challenge                               | Implementation Strategy                                            | Description                                                                                                                                                                                                                      |
|-----------------------------------------|--------------------------------------------------------------------|----------------------------------------------------------------------------------------------------------------------------------------------------------------------------------------------------------------------------------|
| Low visibility of paper forms           | 1) Print on brightly coloured green paper                          | The Footprints Form was printed on bright green paper as a visual prompt.                                                                                                                                                        |
| No accountability for form distribution | 2) Involve the unit communication clerk                            | The unit communication clerks placed the blank Footprints Form in each new patient's chart on admission.                                                                                                                         |
| Lack of form availability               | 3) Make the form available in patient room                         | Blank Footprints Forms were hung from the Whiteboard with a note attached for families "Please take a form to complete and return to the Nurse".                                                                                 |
| Lack of form availability               | 4) Make the form available in waiting room                         | The Footprints Forms were also placed in the ICU waiting room inviting family completion.                                                                                                                                        |
| Not part of routine care                | 5) Include in Daily Goals Checklist (10)                           | A Footprints completion prompt was added to the Daily Goals Checklist.                                                                                                                                                           |
| Lack of nurse motivation                | 6) Share family feedback with nurses via email                     | A synopsis and stories about Footprints family feedback were periodically emailed to each bedside RN.                                                                                                                            |
| Staff forgetfulness                     | 7) Remind staff about Footprints in ICU Newsletter                 | The Footprints Project was featured in the "Practice Polisher" Newsletter.                                                                                                                                                       |
| Staff forgetfulness                     | 8) Role-modelling use of Footprints in practice                    | Team members more attentively used the Footprints Form and Whiteboard in practice to encourage uptake                                                                                                                            |
| Staff forgetfulness                     | 8) Include verbal reminders during huddles with bedside staff      | In small group huddles and ICU walk-about, the research team gave ongoing verbal reminders about Footprints                                                                                                                      |
| Lack of awareness                       | 9) Ongoing interprofessional engagement                            | The research team collaborated with ICU clinicians, Palliative Care and Liaison Psychiatry colleagues for feedback and improvement suggestions.                                                                                  |
| Lack of nursing time to complete form   | 10) Introduce volunteer to engage families to replace former step* | Twice weekly, a volunteer (former ICU nurse) checked patient rooms for completed Footprints and Whiteboards, distributing blank forms to family members as needed, encouraging their completion and return to the bedside nurse. |

\*In July 2017, the tenth step was changed from "A reminder will be given to the nurses to distribute the Footprints Form and complete the Whiteboard as part of the ICU safety briefing". to the volunteer-led family engagement.



**Table 3**      **Footprints Form Audit Completion Rates**

|                                                                          | <b>Audit B</b><br>N=70 patients | <b>Audit C</b><br>N=64 patients | <b>Mean Difference</b><br><b>(95% CI)</b> | <b>P-value</b>        |
|--------------------------------------------------------------------------|---------------------------------|---------------------------------|-------------------------------------------|-----------------------|
| <b>Number of Audit days/patient,</b><br>Mean (SD)                        | 3.50 (1.61)                     | 3.78 (1.47)                     | -0.281 (0.81,<br>0.25)                    | p=0.295               |
|                                                                          |                                 |                                 |                                           | $\chi^2$<br>(p-value) |
| <b>Forms with <math>\geq 1</math> Question</b><br><b>Completed, n(%)</b> | 36 (51.4)                       | 37 (57.8)                       |                                           | p=0.491               |
| Q1- Name, n(%)                                                           | 36 (100)                        | 36 (97.3)                       |                                           | p=0.321               |
| Q2- Language, n(%)                                                       | 35 (97.2)                       | 36 (97.3)                       |                                           | p=0.984               |
| Q3- Grew up, n(%)                                                        | 35 (97.2)                       | 35 (94.6)                       |                                           | p=0.572               |
| Q4- Family members, n(%)                                                 | 34 (94.4)                       | 37 (100)                        |                                           | p=0.146               |
| Q5- Aids or Devices, n(%)                                                | 32 (88.9)                       | 32 (86.5)                       |                                           | p=0.755               |
| Q6- Mobility before ICU, n(%)                                            | 33 (91.7)                       | 34 (91.9)                       |                                           | p=0.972               |
| Q7- Help before ICU, n(%)                                                | 30 (83.3)                       | 34 (91.9)                       |                                           | p=0.266               |
| Q8- Beliefs, values, practices, n(%)                                     | 28 (77.8)                       | 28 (75.7)                       |                                           | p=0.832               |
| Q9- Interests, hobbies, n(%)                                             | 33 (91.7)                       | 33 (89.2)                       |                                           | p=0.719               |
| Q10- Pets, n(%)                                                          | 32 (88.9)                       | 31 (83.8)                       |                                           | p=0.526               |
| Q11- Roles, n(%)                                                         | 32 (88.9)                       | 27 (73.0)                       |                                           | p=0.084               |
| Q12- Personality, n(%)                                                   | 33 (91.7)                       | 33 (89.2)                       |                                           | p=0.719               |
| Q13- Life events, n(%)                                                   | 28 (77.8)                       | 26 (70.3)                       |                                           | p=0.465               |
| Q14- What matters most, n(%)                                             | 28 (77.8)                       | 29 (78.4)                       |                                           | p=0.951               |
| Q15- What else, n(%)                                                     | 22 (61.1)                       | 19 (51.4)                       |                                           | p=0.401               |
| Q16- Your Footprint, n(%)                                                | 21 (58.3)                       | 21 (56.8)                       |                                           | p=0.892               |

**Table 4**      **Footprints Whiteboard Audit Completion Rates**

|                   | <b>Audit B</b><br>N= 70 patients               | <b>Audit C</b><br>N=64 patients               | $\chi^2$<br>(p-value) |
|-------------------|------------------------------------------------|-----------------------------------------------|-----------------------|
| Picture n(%)      | 10 (14.3)                                      | 8 (12.5)                                      | p=0.762               |
| Patient Name n(%) | 63 (90.0)                                      | 58 (90.6)                                     | p=0.903               |
| Spokesperson n(%) | 41 (58.6)                                      | 25 (39.1)                                     | p=0.024*              |
| Goals n(%)        | 9 (12.8)                                       | 2 (3.1)                                       | p=0.040*              |
| Messages n(%)     | 30 (42.9)                                      | 15 (23.4)                                     | p<0.001*              |
| About me n(%)     | 29 (41.4)                                      | 34 (53.1)                                     | p=0.107               |
|                   | <b>Audit B</b><br>N= 247 patient audit<br>days | <b>Audit C</b><br>N=242 patient audit<br>days | $\chi^2$<br>(p-value) |
| Date n(%)         | 224 (90.7)                                     | 216 (89.3)                                    | p=0.598               |
| RN n(%)           | 223 (90.2)                                     | 219 (90.5)                                    | p=0.936               |
| MD n(%)           | 216 (87.4)                                     | 209 (86.4)                                    | p=0.722               |
| RT n(%)           | 169 (68.4)                                     | 132 (54.5)                                    | p=0.002*              |
| PT n(%)           | 19 (11.4) <sup>α</sup>                         | 25 (12.6) <sup>β</sup>                        | p=0.731               |

We excluded weekends and holidays in calculating the patient audit days denominator for physiotherapist name within dynamic whiteboard completion rates.  $\alpha$ - Audit B denominator: n=166 days;  $\beta$ - Audit C denominator: n=198 days

**Table 5** Footprints: Implementation Challenges Identified by Clinicians

| Patient/Family Level Challenges                                                | Clinician Level Challenges                                                                                                                 | System Level Challenges                                                                                                                      |
|--------------------------------------------------------------------------------|--------------------------------------------------------------------------------------------------------------------------------------------|----------------------------------------------------------------------------------------------------------------------------------------------|
| Patient too unstable; other care priorities                                    | Clinicians unsure of how to explain form                                                                                                   | Completed forms not kept in consistent location                                                                                              |
| Patient or family language barrier<br>Perception that family is too distressed | Clinicians concern that it won't be well received<br>Clinicians too busy to hand out or review form or abstract information for whiteboard | Form and whiteboard completion not considered mandatory or enforced                                                                          |
| Patient has no family or friend available                                      | Perceived nursing ownership of the whiteboard; other clinicians reluctant to write on board                                                | Considered unnecessary for patients who are able to communicate themselves<br>Considered unnecessary for patients with a very short ICU stay |

For peer review only

## References

- 1 Koksvik GH. Silent subjects, loud diseases: Enactment of personhood in intensive care. *Health* 2015;20(2):127-142.
- 2 Chochinov HM, McClement S, Hack T, Thompson G, Dufault B, Harlos M. Eliciting personhood within clinical practice: effects on patients, families, and health care providers. *J Pain Symptom Management* 2015;49(6):973-983.
- 3 Meier DE, Back A, Morrison S. The inner life of physician and care of the seriously ill. *JAMA* 2001;286(23):3007-3014. doi:10.1001/jama.286.23.3007
- 4 Pan J, Chochinov H, Thompson G, McClement S. The TIME Questionnaire: A tool for eliciting personhood and enhancing dignity in nursing homes. *Geriatric Nursing* 2016;37:273-277. <http://dx.doi.org/10.1016/j.gerinurse.2016.03.001>
- 5 Fick DM, DiMeglio B, McDowell JA, Mathis-Halpin J. Do you know your patient? *J Gerontol Nurs* 2013;39(9):2–4. doi:10.3928/00989134-20130809-89.
- 6 Patak L, Gawlinski A, Fung NG, Doering L, Berg J, Henneman EA. Communication boards in critical care: patients' views. *Applied Nursing Research* 19 (2006) 182–190.
- 7 Hoad N, French T, Shears M, Toledo F, Clarke F, Swinton M, Duan E, Waugh L, Soth M, Cook D. Personalizing Care for Critically Ill Patients: The Footprints Project. *Can Crit Care Forum Abstract Book* 2016;A110.
- 8 Hoad N, French T, Shears M, Toledo F, Clarke F, Swinton M, Duan E, Waugh L, Soth M, Cook D. Personalizing Care for Critically Ill Patients: The Footprints Project. *Canadian Critical Care Forum* 2016, Toronto, ON, October 2016. *Can Crit Care Forum Abstract Book* 2016.
- 9 Hoad N, French T, Shears M, Waugh L, Soth M, Lovell O, Toledo F, Boyle A, Cook D. Footprints of Life: Steps in the Development and Implementation of an Interprofessional ICU Initiative to Humanize Health Care. *Niagara Health Quality Symposium Abstract Book* 2016.
- 10 Centofanti J, Duan E, Hoad N, Swinton M, Perri D, Waugh L, Cook DJ. Use of a Daily Goals Checklist for Morning ICU Rounds: A Mixed-Methods Study. *Crit Care Med* 2014;42:1797–1803.
- 11 Hsieh HF, Shannon SE. Three approaches to qualitative content analysis. *Qualitative Health Research* 2005;15(9):1277-1288.
- 12 Rodgers BL, Cowles KV. The qualitative research audit trail: A complex collection of documentation. *Research in Nursing & Health* 1993;16(3):219-226.
- 13 Sandelowski M. Whatever happened to qualitative description? *Research in Nursing & Health* 2000;23(1):334-340.
- 14 Abdul-Razzak A, You J, Sherifali D, Simon J, Brazil K. 'Conditional candour' and 'knowing me': an interpretive description study on patient preferences for physician behaviours during end-of-life communication. *BMJ Open* 2014;4:e005653. doi:10.1136/bmjopen-2014-005653
- 15 Moniz T, Lingard L, Watling C. Stories Doctors Tell *JAMA* 2017;318(2):124-125.

- 1  
2  
3  
4 16 Gazarian PK, Morrison CR, Lehmann LS, Tamir O, Bates DW, Rozenblum R. Patients' and care partners'  
5 perspectives on dignity and respect during acute care hospitalization. *J Patient Saf* [online ahead of print] 22 Feb  
6 2017; DOI: 10.1097/ PTS.0000000000000353.
- 7  
8 17 Sokol-Hessner L, Folcarelli PH, Sands KE. Emotional harm from disrespect: the neglected preventable harm.  
9 *BMJ Qual Saf* 2015;24: 550–553.
- 10  
11 18 Brown SM, Azoulay E, Benoit D, Butler TP, Folcarelli P, Geller G, Rozenblum R, Sands K, Sokol-Hessner L,  
12 Talmor D, Turner K, Howell MD. The Practice of Respect in the ICU. *Am J Resp Crit Care Med*  
13 2018;197(11):1389-1385.
- 14  
15 19 Beach MC, Duggan PS, Cassel CK, Geller G. What does 'respect' mean? Exploring the moral obligation of  
16 health professionals to respect patients. *J Gen Intern Med* 2007;22:692–695.
- 17  
18 20 Cook DJ, Swinton M, Toledo F, Clarke F, Rose T, Hand-Breckenridge T, Boyle A, Woods A, Zytaruk N,  
19 Heels-Ansdell D, Sheppard RD. Personalizing Death in the ICU: The Three Wishes Project. *Ann Intern Med*  
20 2015;163:271-279. doi:10.7326/M15-0502.
- 21  
22 21 Chochinov HM. Dignity and the essence of medicine: the A, B, C, and D of dignity conserving care. *BMJ*  
23 2007;335:184-187
- 24  
25 22 Galvin IM, Leitch J, Gill R, Poser K, McKeown S. Humanization of critical care—psychological effects on  
26 healthcare professionals and relatives: a systematic review. *Can J Anesth* 2018;65:1348–1371.
- 27  
28 23 Emanuel EJ, Gudbranson E. Does Medicine Overemphasize IQ? *JAMA* 2018;319(7):651-652.
- 29  
30  
31  
32  
33  
34  
35  
36  
37  
38  
39  
40  
41  
42  
43  
44  
45  
46  
47  
48  
49  
50  
51  
52  
53  
54  
55  
56  
57  
58  
59  
60

## Supplementary File 1

Patient Label

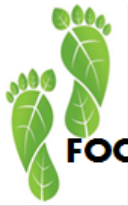

# We'd like to get to know you

To help us provide more personalized care in the ICU, we would like to get to know our patients better. We invite you to answer these questions on behalf of your family member. If you prefer not to share certain information, you can leave spaces blank.

This information will be kept on the chart as a reference for the healthcare team.

We encourage you to **bring in a photo** to display on the whiteboard as well.

**Please return the form to the nurse when complete. Thanks!**

Patient Name: \_\_\_\_\_ ICU Admission Date: \_\_\_\_\_

1. What **name** do you prefer to be called?

\_\_\_\_\_

2. What **language** do you prefer to speak?

\_\_\_\_\_

3. **Where** did you **grow up**?

\_\_\_\_\_

4. **Family members** that we may meet:

\_\_\_\_\_

5. Type of **aids or devices** you use at home:

(e.g., glasses, dentures, hearing aid, CPAP machine, iPad, tablet)

\_\_\_\_\_

6. Level of **mobility before ICU**:

(e.g., independent / no assistance, cane or walker, wheelchair)

\_\_\_\_\_

7. **Help** you needed **before ICU**:

(e.g., driving, cooking, bathing, finances)

\_\_\_\_\_

(Continued on other side)

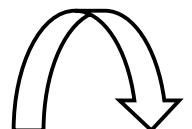

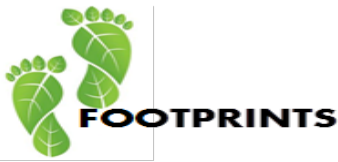

1  
2  
3  
4  
5  
6  
7 **8. Beliefs, values or practices that are spiritual or religious:**  
8  
9

---

10  
11 **9. Interests/Hobbies:**

12 (e.g., TV, reading, music, golf, knitting, woodworking)  
13  
14

---

15  
16 **10. Pets at home:**  
17  
18

---

19  
20 **11. Roles – past or present:**

21 (e.g., parent, volunteer, teacher, caregiver)  
22  
23

---

24  
25 **12. Personality traits:**

26 (e.g., shy, talkative, funny, anxious, claustrophobic)  
27  
28

---

29  
30 **13. Life events:**

31 (e.g., recently married, just retired, grandparent, experienced a loss)  
32  
33

---

34  
35  
36 **14. What matters most to you:**

37 (e.g., physical independence, ability to manage personal matters, comfort)  
38  
39

---

40  
41 **15. What else should we know about you as a person to look after you right now?**  
42  
43

---

44  
45 **16. A little more about your FOOTPRINT -Please add a few key words, phrase or quote**  
46 **that summarizes your views or journey, or what is important to you**  
47  
48

---

# Audit

## Interviews and Focus Groups

10 Clinician Interviews  
 25 Clinicians in 4 Focus Groups  
 13 Family Members of 10 Families  
 5 Patients

**Audit A**  
 July 2016

**Audit B**  
 June 2017

**Audit C**  
 May 2018

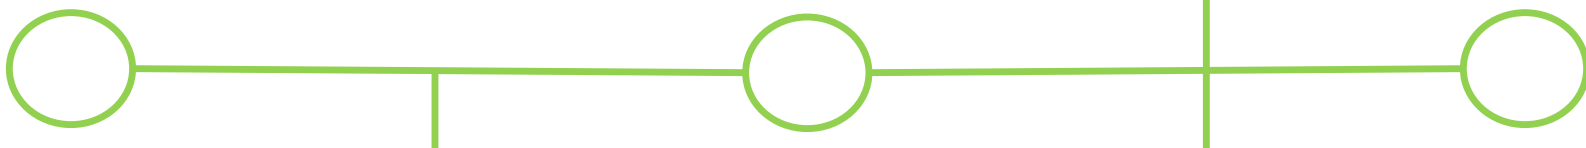

### Implementation Strategies

- 1.Green paper
- 2.Blank form inclusion in chart
- 3.Blank forms hung from white board
- 4.Waiting room copies
- 5.Incorporation in daily goals checklist
- 6.Email updates
- 7.Nursing Newsletter
- 8.Interprofessional role modeling
- 9.Ongoing verbal reminders
- 10.Safety briefing highlight ->

### Implementation Strategies

1. Green paper
2. Blank form inclusion in chart
3. Blank forms hung from white board
4. Waiting room copies
5. Incorporation in daily goals checklist
6. Email updates
7. Nursing Newsletter
8. Interprofessional role modeling
9. Ongoing verbal reminders
- 10.Volunteer 2x/week**

1  
2  
3  
4  
5  
6  
7  
8  
9  
10  
11  
12  
13  
14  
15  
16  
17  
18  
19  
20  
21  
22  
23  
24  
25  
26  
27  
28  
29  
30  
31  
32  
33  
34  
35  
36  
37  
38  
39  
40  
41



1  
2  
3  
4  
5  
6  
7  
8  
9  
10  
11  
12  
13  
14  
15  
16  
17  
18  
19  
20  
21  
22  
23  
24  
25  
26  
27  
28  
29  
30  
31  
32  
33  
34  
35  
36  
37  
38  
39  
40  
41  
42  
43  
44  
45  
46  
47  
48  
49  
50  
51  
52  
53  
54  
55  
56  
57  
58  
59  
60

Supplementary File 3

Qualitative Results for Influence of the Footprints Project

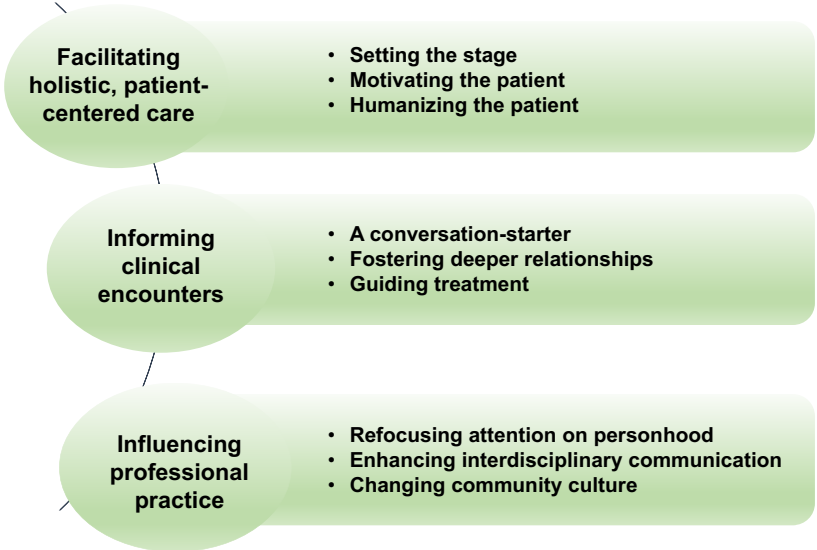

review only

## COREQ (CONsolidated criteria for REporting Qualitative research) Checklist

A checklist of items that should be included in reports of qualitative research. You must report the page number in your manuscript where you consider each of the items listed in this checklist. If you have not included this information, either revise your manuscript accordingly before submitting or note N/A.

| Topic                                          | Item No. | Guide Questions/Description                                                                                                                              | Reported on Page No. |
|------------------------------------------------|----------|----------------------------------------------------------------------------------------------------------------------------------------------------------|----------------------|
| <b>Domain 1: Research team and reflexivity</b> |          |                                                                                                                                                          |                      |
| <i>Personal characteristics</i>                |          |                                                                                                                                                          |                      |
| Interviewer/facilitator                        | 1        | Which author/s conducted the interview or focus group?                                                                                                   |                      |
| Credentials                                    | 2        | What were the researcher's credentials? E.g. PhD, MD                                                                                                     |                      |
| Occupation                                     | 3        | What was their occupation at the time of the study?                                                                                                      |                      |
| Gender                                         | 4        | Was the researcher male or female?                                                                                                                       |                      |
| Experience and training                        | 5        | What experience or training did the researcher have?                                                                                                     |                      |
| <i>Relationship with participants</i>          |          |                                                                                                                                                          |                      |
| Relationship established                       | 6        | Was a relationship established prior to study commencement?                                                                                              |                      |
| Participant knowledge of the interviewer       | 7        | What did the participants know about the researcher? e.g. personal goals, reasons for doing the research                                                 |                      |
| Interviewer characteristics                    | 8        | What characteristics were reported about the interviewer/facilitator? e.g. Bias, assumptions, reasons and interests in the research topic                |                      |
| <b>Domain 2: Study design</b>                  |          |                                                                                                                                                          |                      |
| <i>Theoretical framework</i>                   |          |                                                                                                                                                          |                      |
| Methodological orientation and Theory          | 9        | What methodological orientation was stated to underpin the study? e.g. grounded theory, discourse analysis, ethnography, phenomenology, content analysis |                      |
| <i>Participant selection</i>                   |          |                                                                                                                                                          |                      |
| Sampling                                       | 10       | How were participants selected? e.g. purposive, convenience, consecutive, snowball                                                                       |                      |
| Method of approach                             | 11       | How were participants approached? e.g. face-to-face, telephone, mail, email                                                                              |                      |
| Sample size                                    | 12       | How many participants were in the study?                                                                                                                 |                      |
| Non-participation                              | 13       | How many people refused to participate or dropped out? Reasons?                                                                                          |                      |
| <i>Setting</i>                                 |          |                                                                                                                                                          |                      |
| Setting of data collection                     | 14       | Where was the data collected? e.g. home, clinic, workplace                                                                                               |                      |
| Presence of non-participants                   | 15       | Was anyone else present besides the participants and researchers?                                                                                        |                      |
| Description of sample                          | 16       | What are the important characteristics of the sample? e.g. demographic data, date                                                                        |                      |
| <i>Data collection</i>                         |          |                                                                                                                                                          |                      |
| Interview guide                                | 17       | Were questions, prompts, guides provided by the authors? Was it pilot tested?                                                                            |                      |
| Repeat interviews                              | 18       | Were repeat interviews carried out? If yes, how many?                                                                                                    |                      |
| Audio/visual recording                         | 19       | Did the research use audio or visual recording to collect the data?                                                                                      |                      |
| Field notes                                    | 20       | Were field notes made during and/or after the interview or focus group?                                                                                  |                      |
| Duration                                       | 21       | What was the duration of the interviews or focus group?                                                                                                  |                      |
| Data saturation                                | 22       | Was data saturation discussed?                                                                                                                           |                      |
| Transcripts returned                           | 23       | Were transcripts returned to participants for comment and/or                                                                                             |                      |

| Topic                                  | Item No. | Guide Questions/Description                                                                                                        | Reported on Page No. |
|----------------------------------------|----------|------------------------------------------------------------------------------------------------------------------------------------|----------------------|
|                                        |          | correction?                                                                                                                        |                      |
| <b>Domain 3: analysis and findings</b> |          |                                                                                                                                    |                      |
| <i>Data analysis</i>                   |          |                                                                                                                                    |                      |
| Number of data coders                  | 24       | How many data coders coded the data?                                                                                               |                      |
| Description of the coding tree         | 25       | Did authors provide a description of the coding tree?                                                                              |                      |
| Derivation of themes                   | 26       | Were themes identified in advance or derived from the data?                                                                        |                      |
| Software                               | 27       | What software, if applicable, was used to manage the data?                                                                         |                      |
| Participant checking                   | 28       | Did participants provide feedback on the findings?                                                                                 |                      |
| <i>Reporting</i>                       |          |                                                                                                                                    |                      |
| Quotations presented                   | 29       | Were participant quotations presented to illustrate the themes/findings?<br>Was each quotation identified? e.g. participant number |                      |
| Data and findings consistent           | 30       | Was there consistency between the data presented and the findings?                                                                 |                      |
| Clarity of major themes                | 31       | Were major themes clearly presented in the findings?                                                                               |                      |
| Clarity of minor themes                | 32       | Is there a description of diverse cases or discussion of minor themes?                                                             |                      |

Developed from: Tong A, Sainsbury P, Craig J. Consolidated criteria for reporting qualitative research (COREQ): a 32-item checklist for interviews and focus groups. *International Journal for Quality in Health Care*. 2007. Volume 19, Number 6: pp. 349 – 357

**Once you have completed this checklist, please save a copy and upload it as part of your submission. DO NOT include this checklist as part of the main manuscript document. It must be uploaded as a separate file.**
