# Supplementary material for: Fostering humanism: a mixed methods evaluation of the Footprints Project in critical care
Source: PubMed Central journal article supplement — BMJ Open. 2019 Nov 2;9(11):e029810. doi: 10.1136/bmjopen-2019-029810 (PMC6830601; doi:10.1136/bmjopen-2019-029810), 2019-11-02
Supplement: bmjopen-2019-029810supp002.pdf [file bmjopen-2019-029810supp002.pdf]

## Supplementary File 2

# Audit

**Audit A**  
July 2016

**Audit B**  
June 2017

**Audit C**  
May 2018

**Interviews and Focus Groups**

10 Clinician Interviews  
25 Clinicians in 4 Focus Groups  
13 Family Members of 10 Families  
5 Patients

**Implementation Strategies**

1. Green paper
2. Blank form inclusion in chart
3. Blank forms hung from white board
4. Waiting room copies
5. Incorporation in daily goals checklist
6. Email updates
7. Nursing Newsletter
8. Interprofessional role modeling
9. Ongoing verbal reminders
10. Safety briefing highlight ->

**Implementation Strategies**

1. Green paper
2. Blank form inclusion in chart
3. Blank forms hung from white board
4. Waiting room copies
5. Incorporation in daily goals checklist
6. Email updates
7. Nursing Newsletter
8. Interprofessional role modeling
9. Ongoing verbal reminders
- 10. Volunteer 2x/week**
