# Supplementary figures and images for: Fostering humanism: a mixed methods evaluation of the Footprints Project in critical care
Source: PubMed Central journal article supplement — BMJ Open. 2019 Nov 2;9(11):e029810. doi: 10.1136/bmjopen-2019-029810 (PMC6830601; doi:10.1136/bmjopen-2019-029810), 2019-11-02

## Supplementary File 3

## Qualitative Results for Influence of the Footprints Project

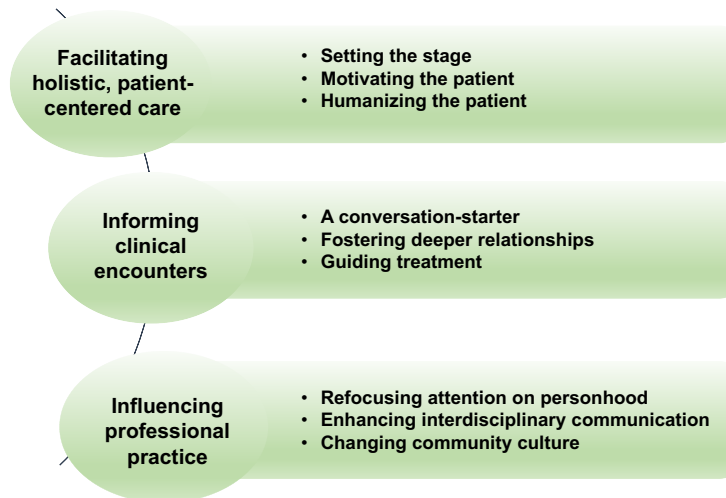

Supplement: bmjopen-2019-029810supp003.pdf [file bmjopen-2019-029810supp003.pdf]
